# Supplementary material
Source: PubMed Central journal article supplement (PMC3448425)
Supplement: supp_mcs171_mcs171supp.pdf [file supp_mcs171_mcs171supp.pdf]

## SUPPLEMENTARY DATA

FIG. S1. Ploidy variation and taxonomic composition of *Gymnadenia conopsea* s.l. populations studied in the present study and by Trávníček *et al.* (2011); the distributional maps are based on nearly 10,000 cytotyped individuals. (A) Diploid populations (either ploidy-uniform or with the presence of minority cytotypes). Intrapopulation taxonomic heterogeneity is indicated by mixed colours. (B) Tetraploid (squares) and mixed  $2x-4x$  (triangles) populations. Intrapopulation taxonomic heterogeneity is indicated by mixed colours. (C) Populations harbouring minority cytotypes ( $3x$ , blue;  $5x$ , yellow;  $6x$ , red). The presence of both majority ploidy levels ( $2x$ ,  $4x$ ) is illustrated by a circle while triangles illustrate otherwise exclusive di- or tetraploid populations. Co-occurrence of different minority cytotypes is indicated by mixed colours. Arrows designate populations in which additional cytotype (most likely diploid) is expected (sympatry of  $3x+4x$  or  $4x+5x$ ). Taxa abbreviation in (A) and (B): 2B,  $2x$  *G. borealis*; 2C,  $2x$  *G. conopsea*; 2D,  $2x$  *G. densiflora*; 2F,  $2x$  *G. frivaldii*; 2O,  $2x$  *G. odoratissima*; 2Sp, undetermined diploid from France; 4C,  $4x$  *G. conopsea*; 4Sp, undetermined tetraploid from France.

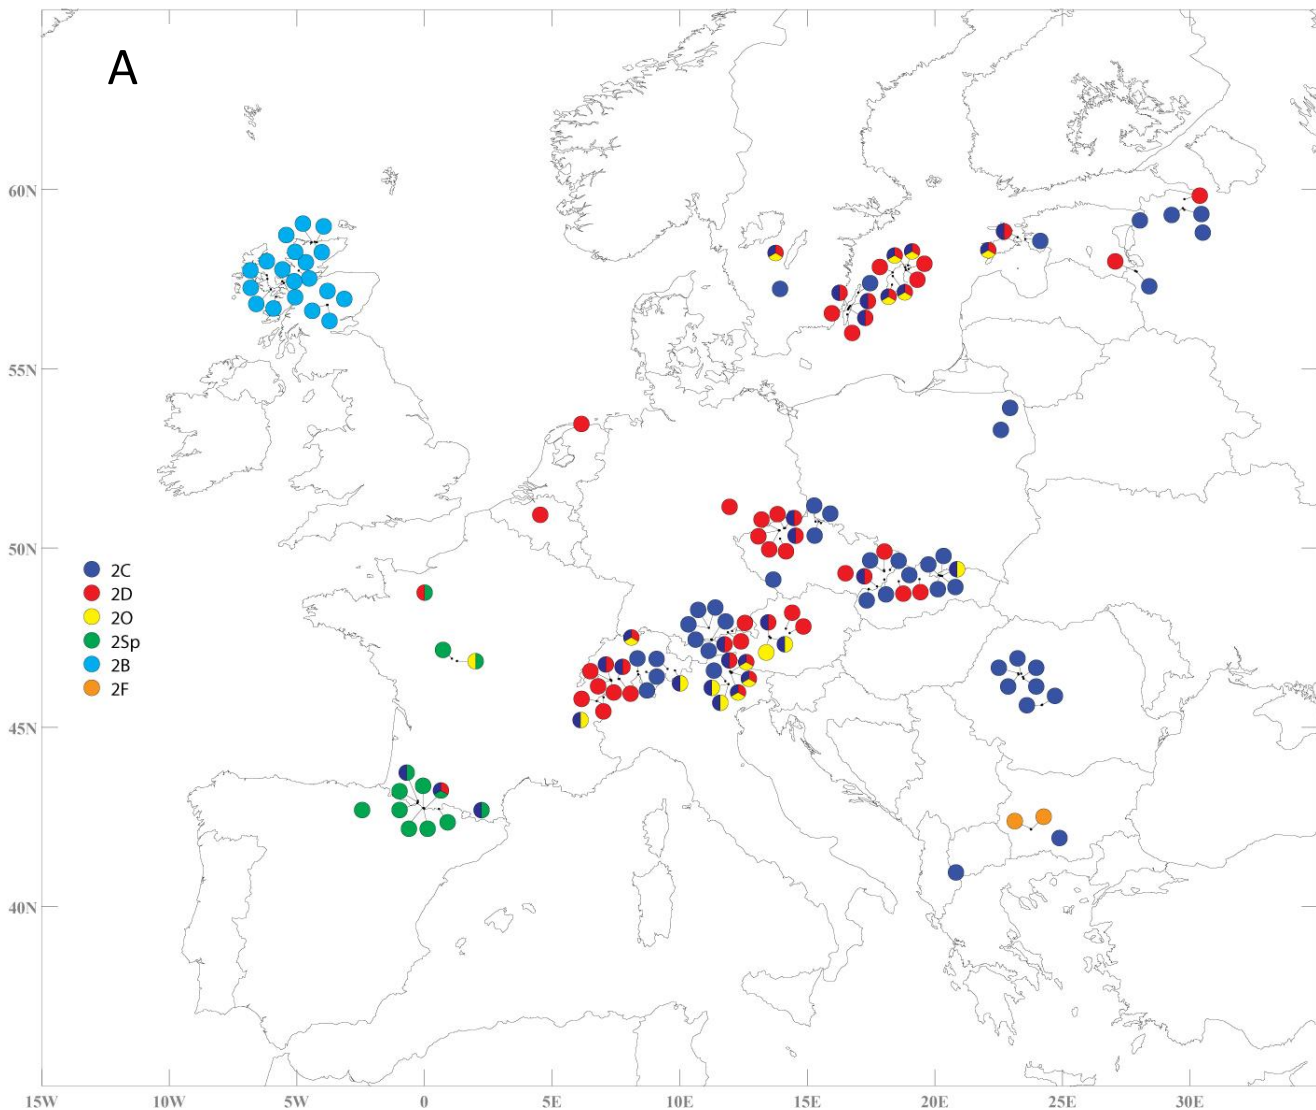

B

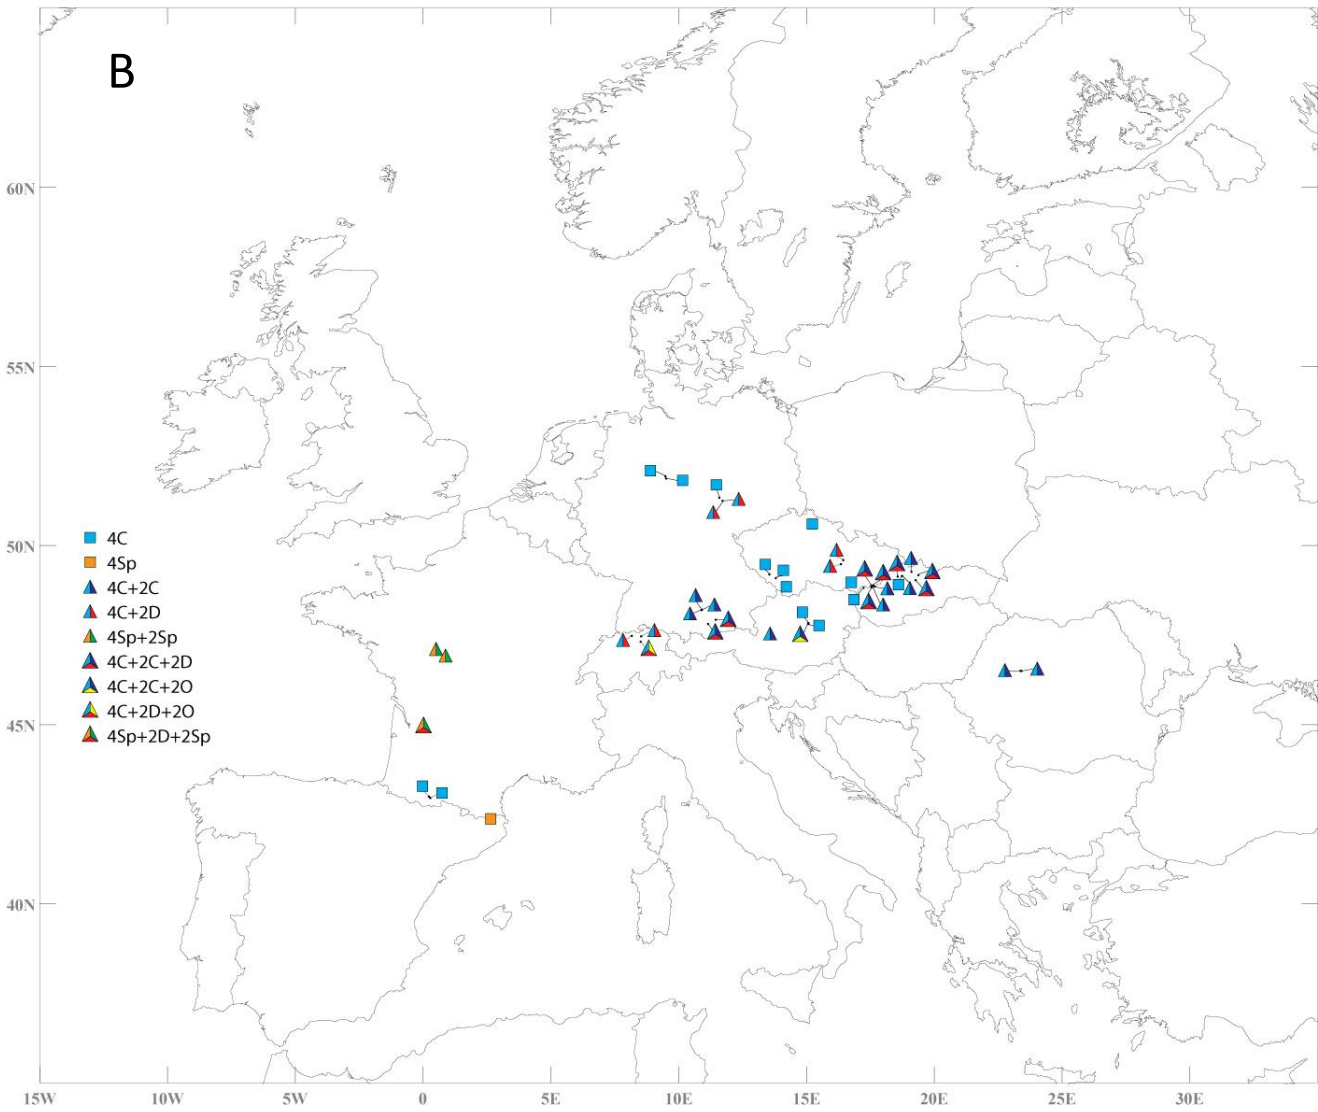

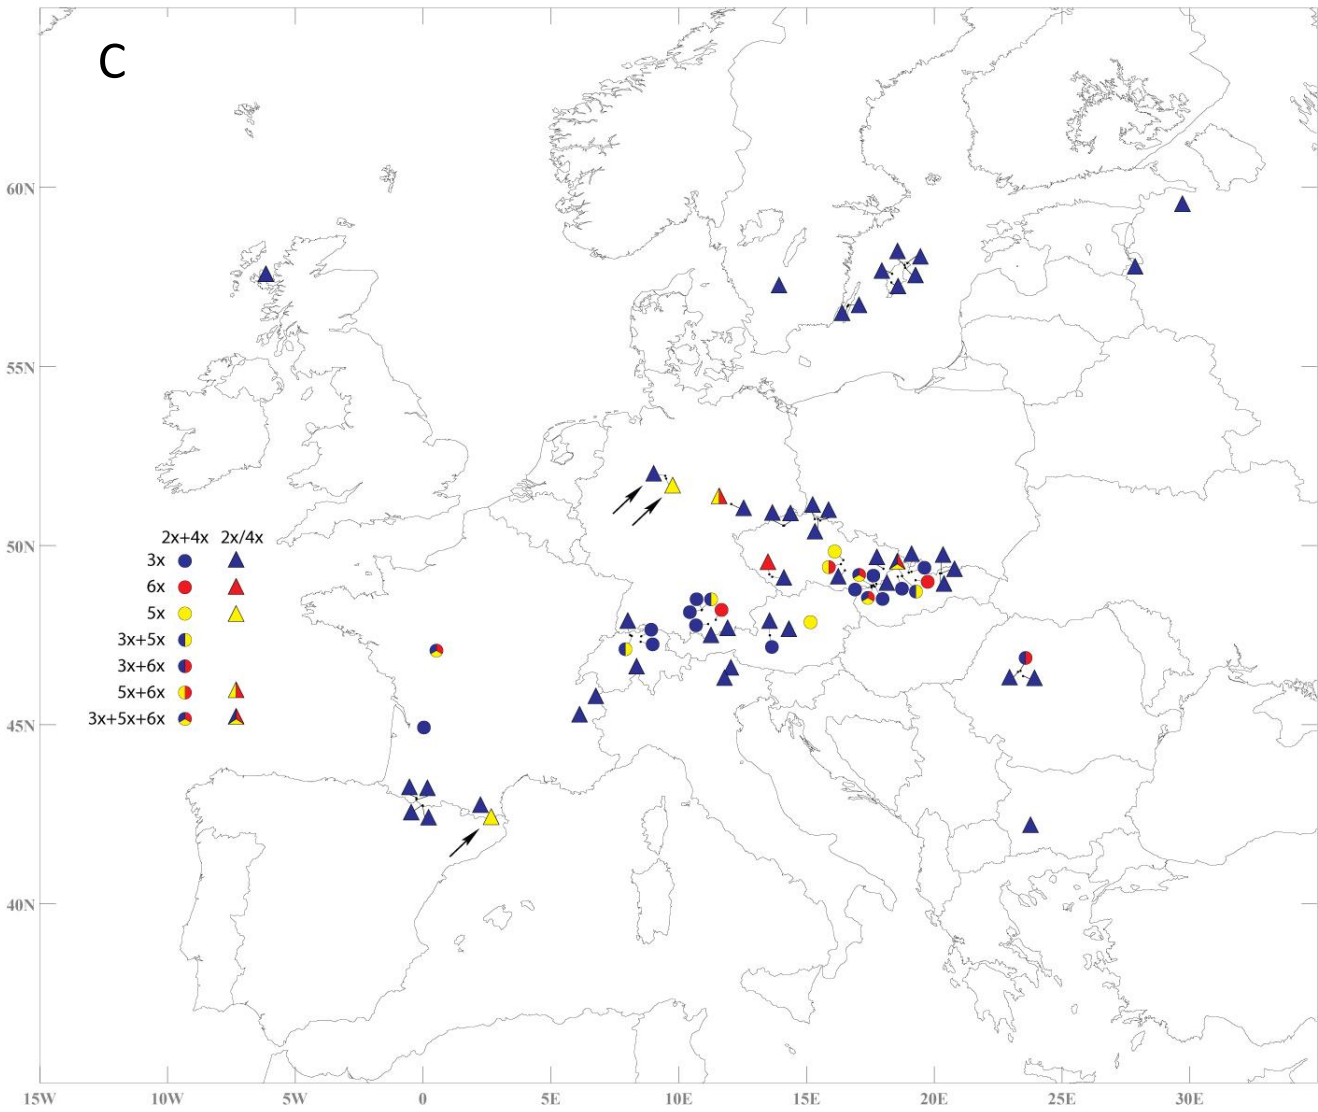

FIG. S2. Images of the *Gymnadenia* taxa investigated (habitus and inflorescence detail). Pictures from sites where morphometric analysis of 20 plants was undertaken are accompanied by mean  $\pm$  s.d. of plant height and inflorescence length (in cm). Flower detail is provided for taxa in which the spur length is of taxonomic value.

**2x *G. conopsea* – loc. DE08:** Kranzberg, Upper Bavaria, Germany, 1080 m a.s.l., 28.6.2010 (V. Čurn)

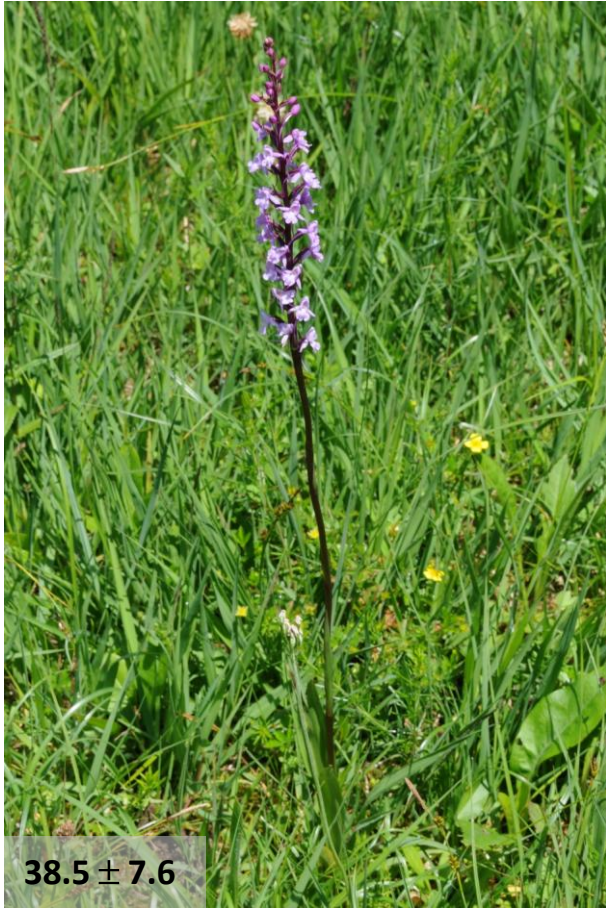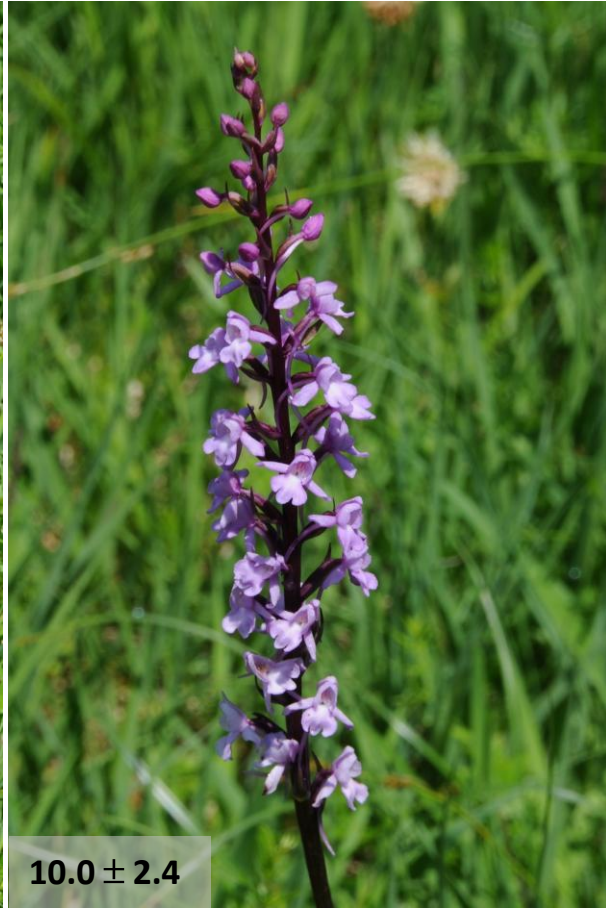

4x *G. conopsea* – loc. FR06: pass Col de Jau, Quillan, France, 1265 m a.s.l., 4.7.2011 (P. Trávníček)

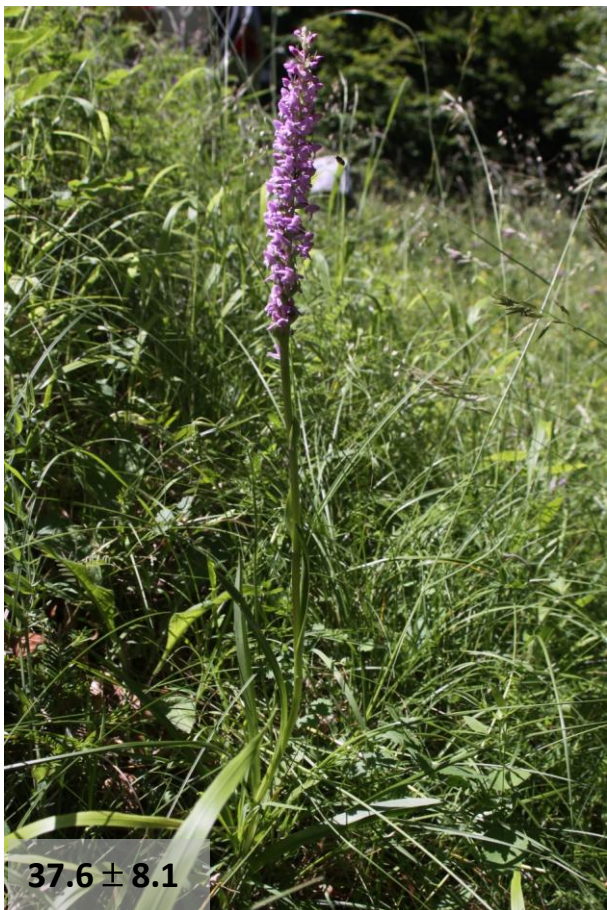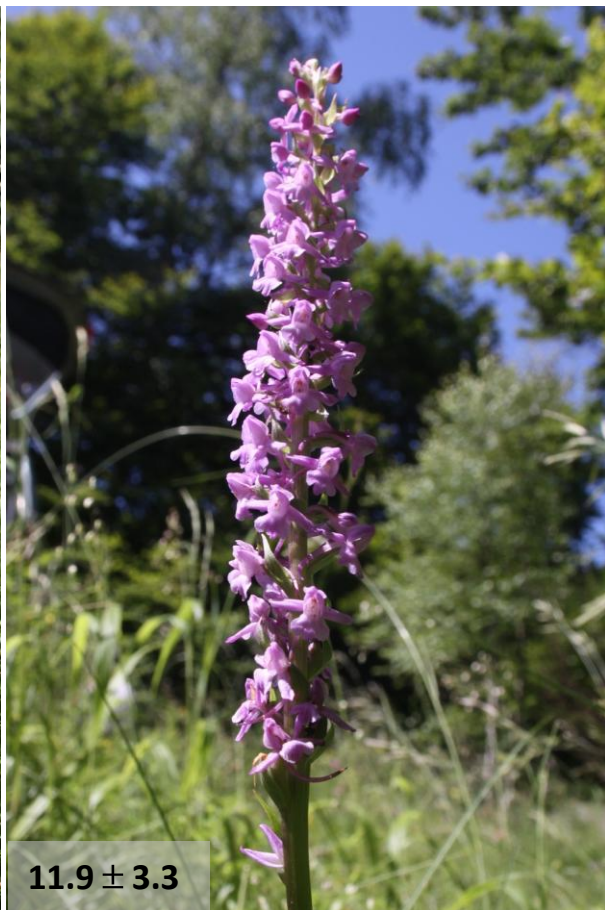

4x *G. conopsea* – loc. DE12: Prittiching, Upper Bavaria, Germany, 550 m a.s.l., 20.6.2011 (V. Čurn)

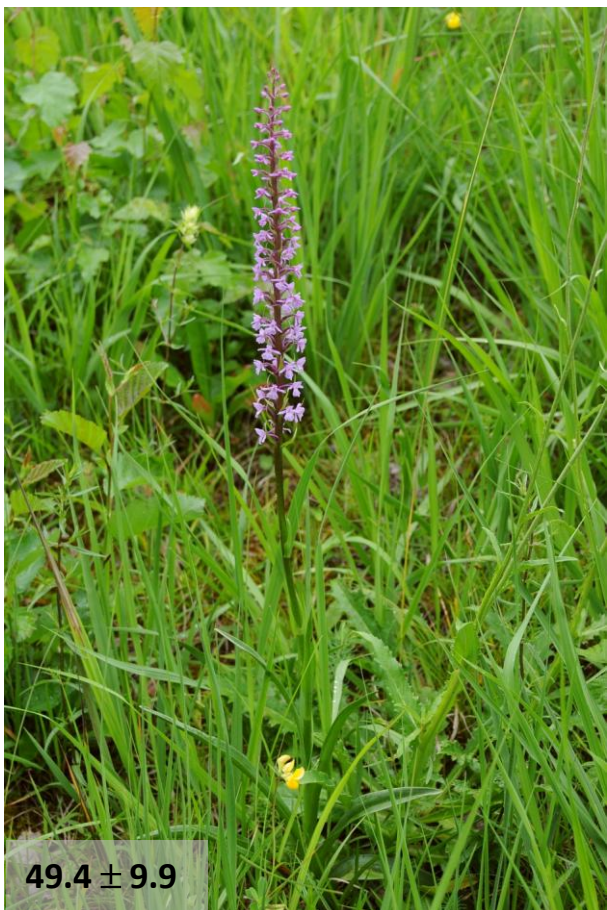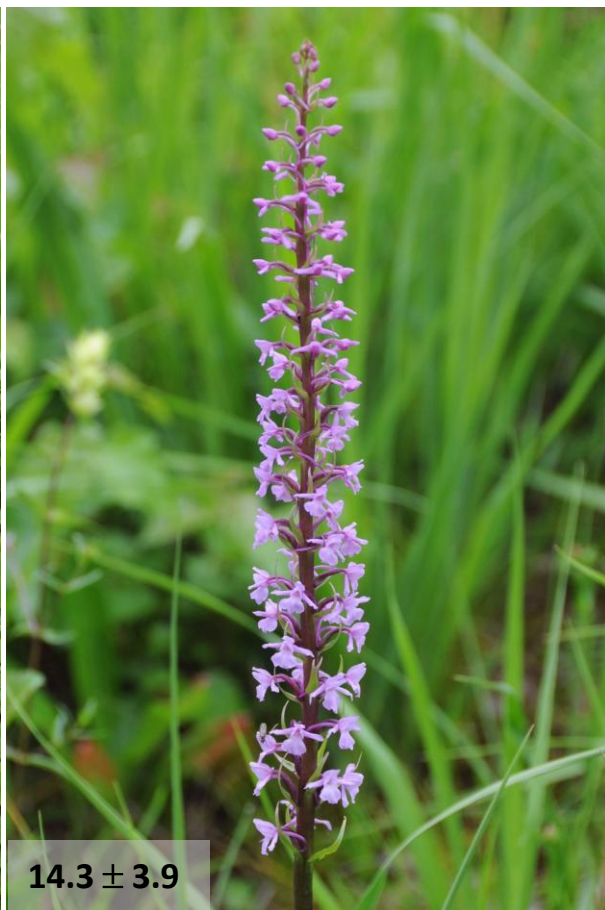

*G. densiflora* – loc. SE12: wetland Torpmossen, Öland, Sweden, 20 m a.s.l., 26.5.2011 (J. Jersáková)

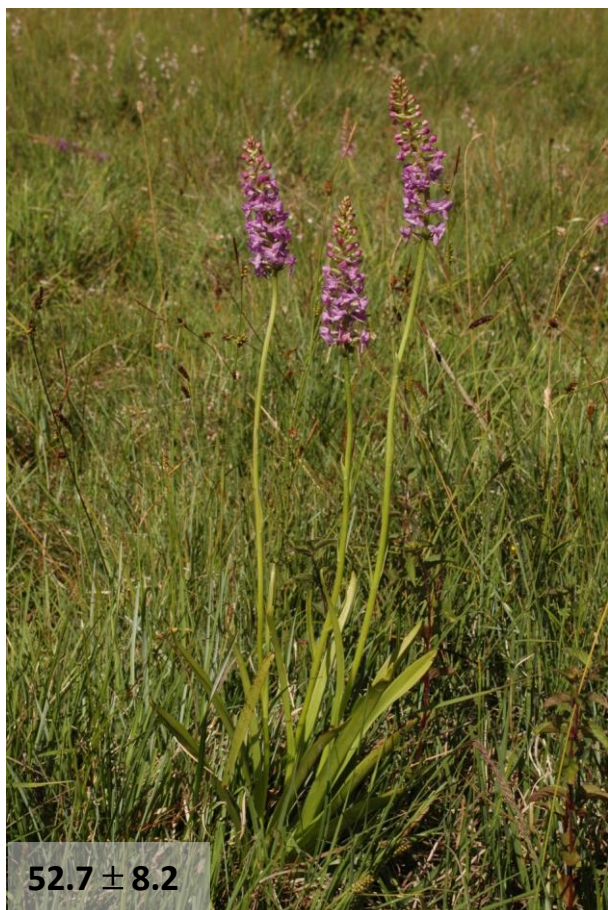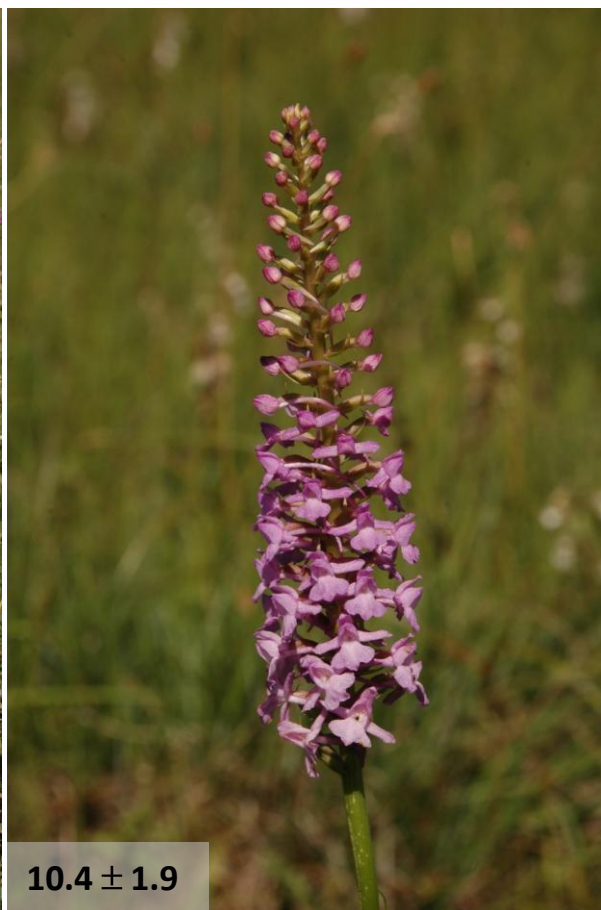

*G. densiflora* – loc. AT09: Warscheneck, Totes Gebirge, Austria, 930 m a.s.l., 21.7.2008 (V. Čurn)

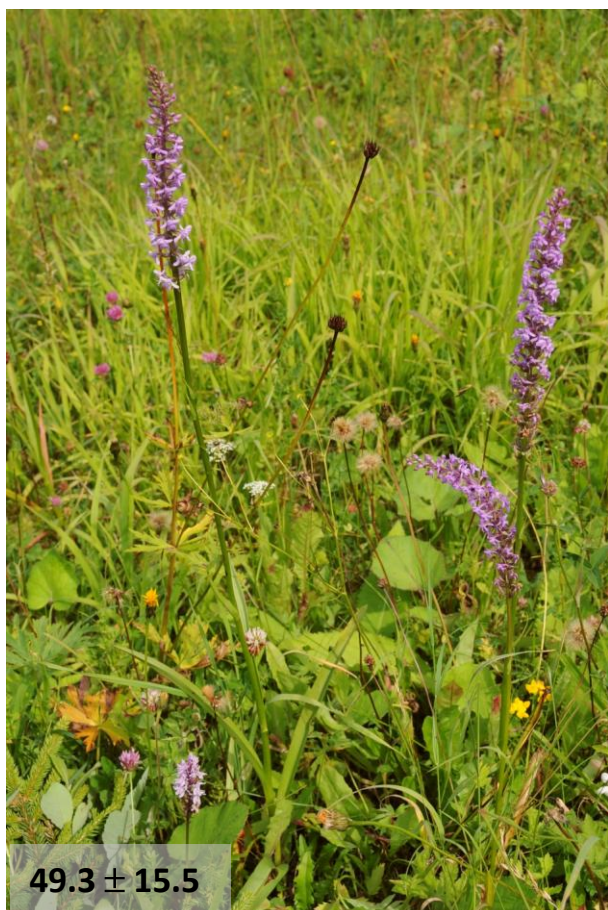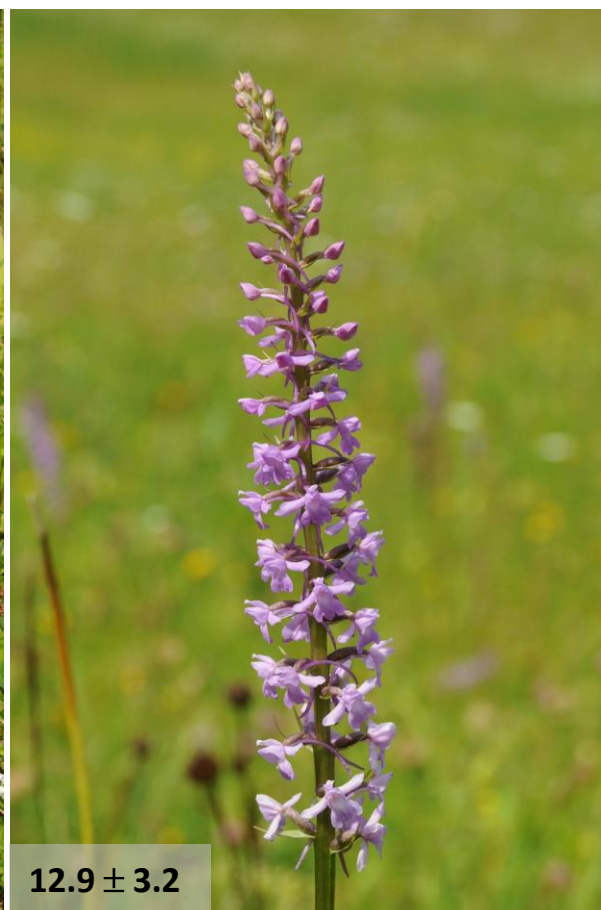

*G. borealis* – loc. GB03: Inverdrue, Highland, Scotland, 310 m a.s.l., 23.6.2010 (J. Suda)

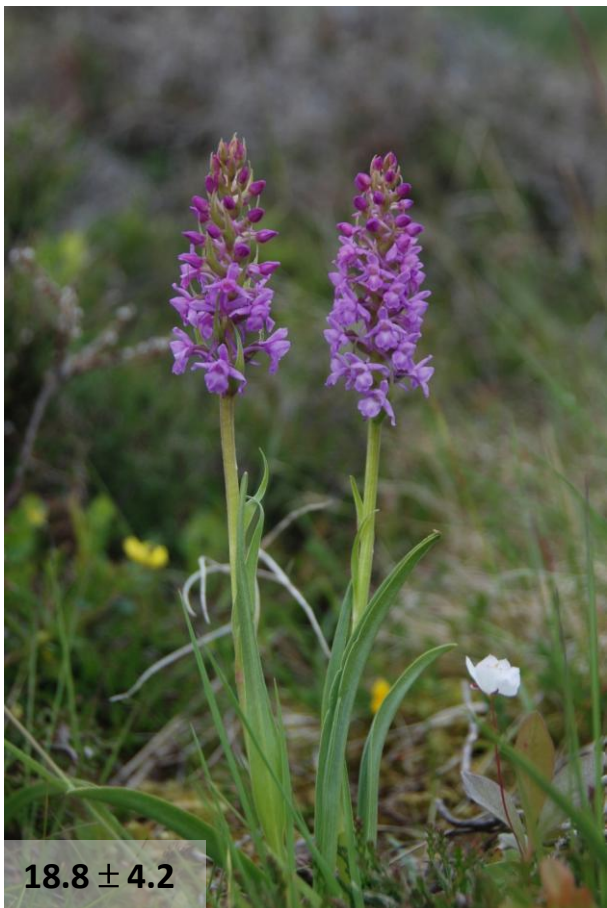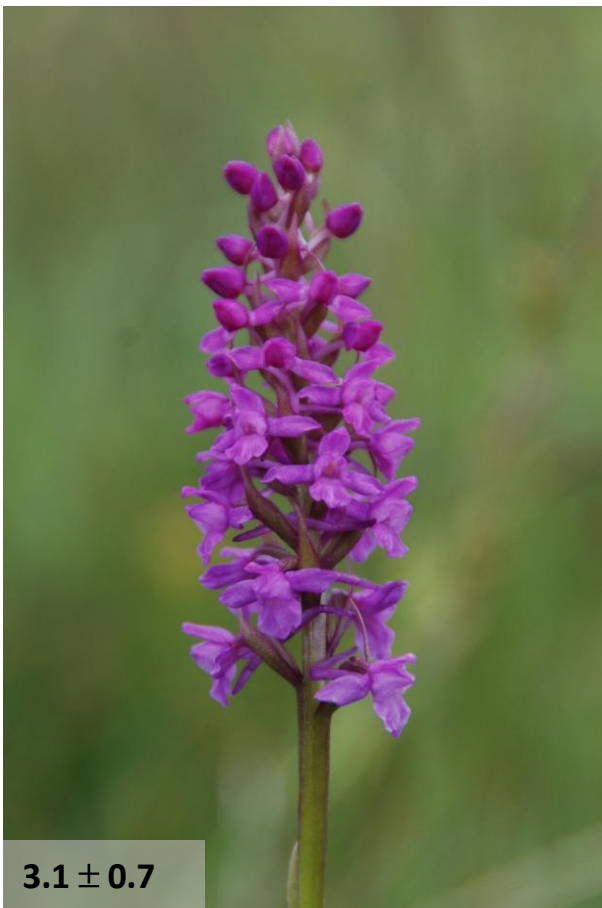

*G. frivaldii* – loc. BG02: Belmeken Reservoir, Rila Mts., Bulgaria, 2100 m a.s.l., 25.7.2010 (P. Hájková, M. Štech)

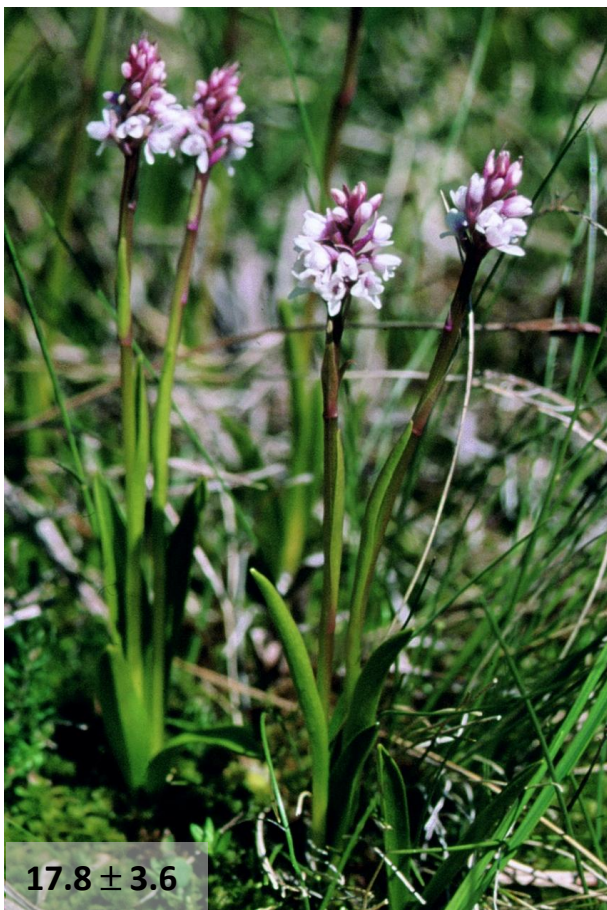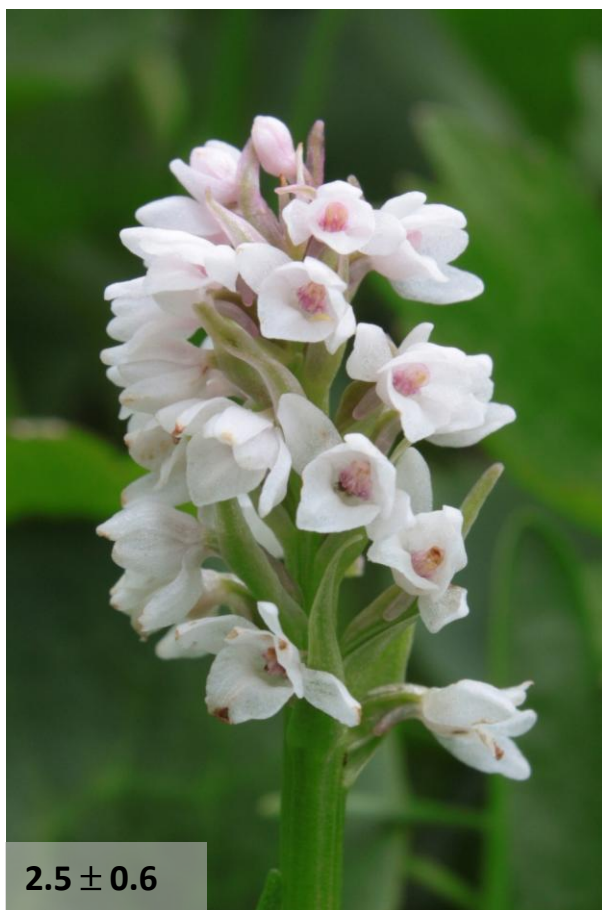

*G. odoratissima* - loc. SE04: Hoburgsmyr mire, Gotland, Sweden, 30 m a.s.l., 11.7.2010 (J. Jersáková)

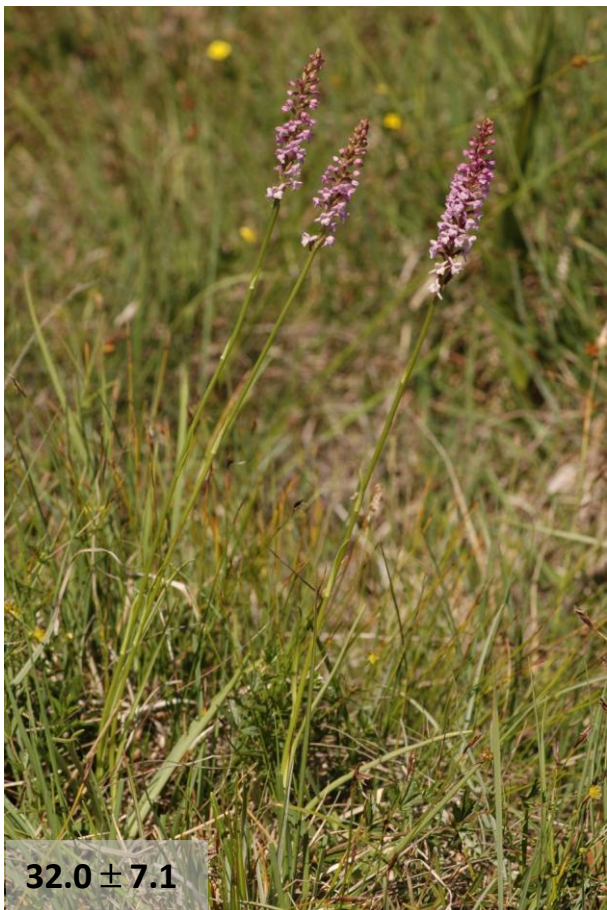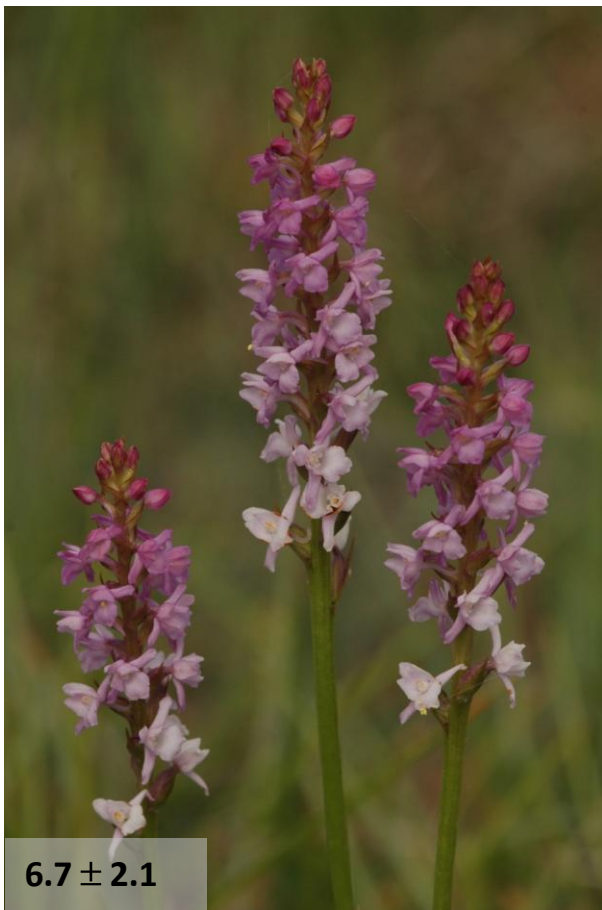

*G. odoratissima* – loc. IT09: Falzarego Pass, Dolomites, Italy, 2170 m a.s.l., 20.7.2009 (V. Čurn)

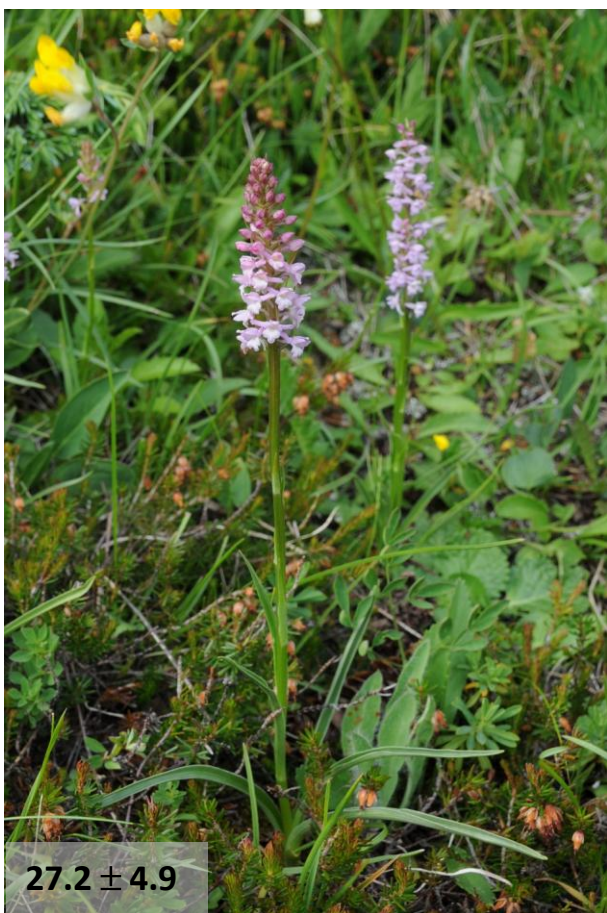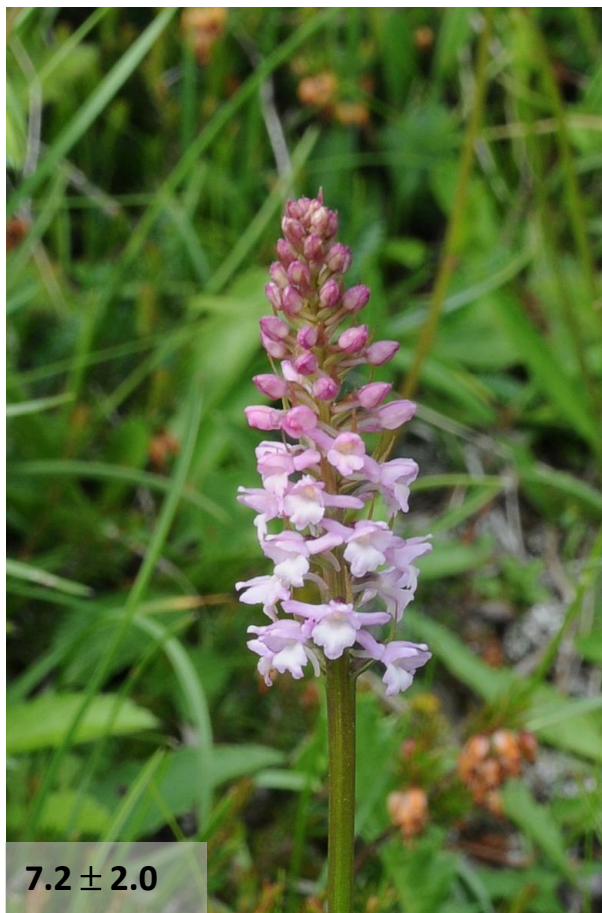



Plants corresponding to *G. conopsea* var. *alpina* (not distinguished from the nominate variety in our study) – loc. IT07: Paneveggio Pale di San Martino NP, Trentino, Italy, 2000 m a.s.l., 3.7.2011 (V. Čurn)

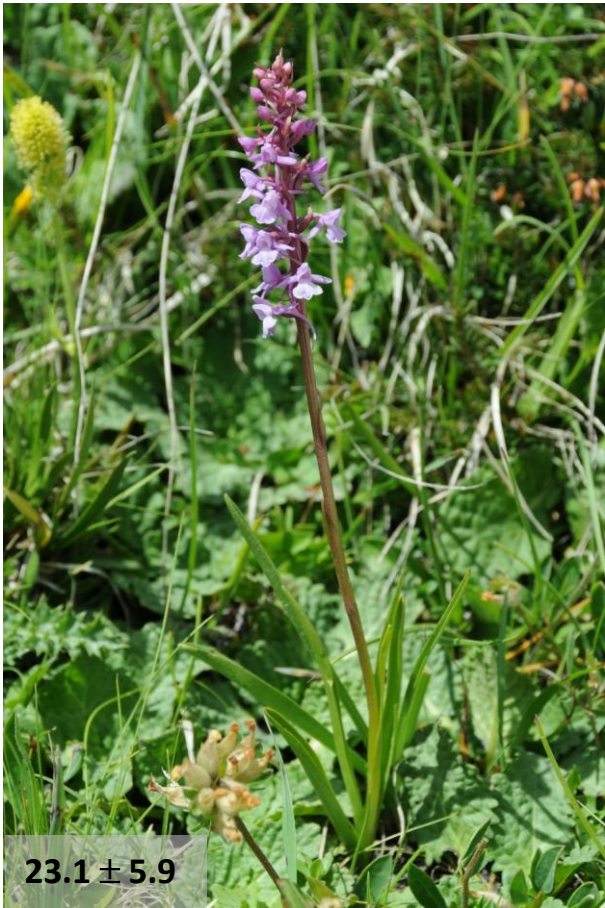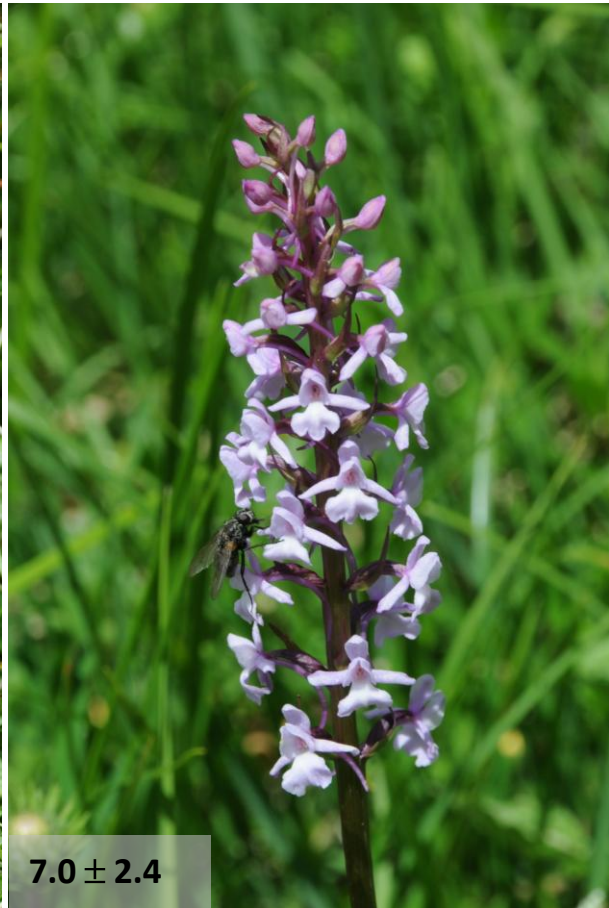

Plants corresponding to *G. conopsea* var. *alpina* (not distinguished from the nominate variety in our study) – loc. DE10: St. Anton, Mittenwald, Upper Bavaria, Germany, 1230 m a.s.l., 18.7.2010 (C.A.J. Kreutz)

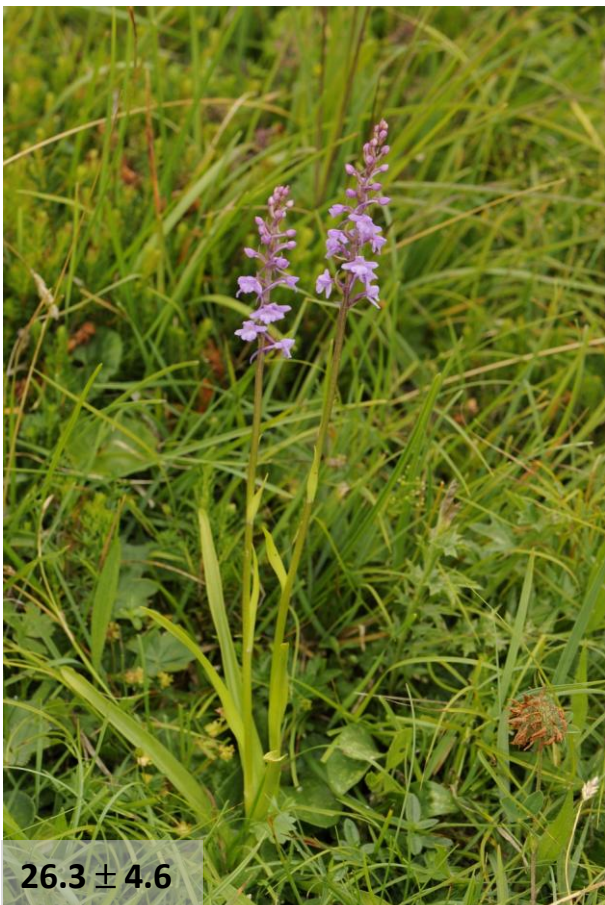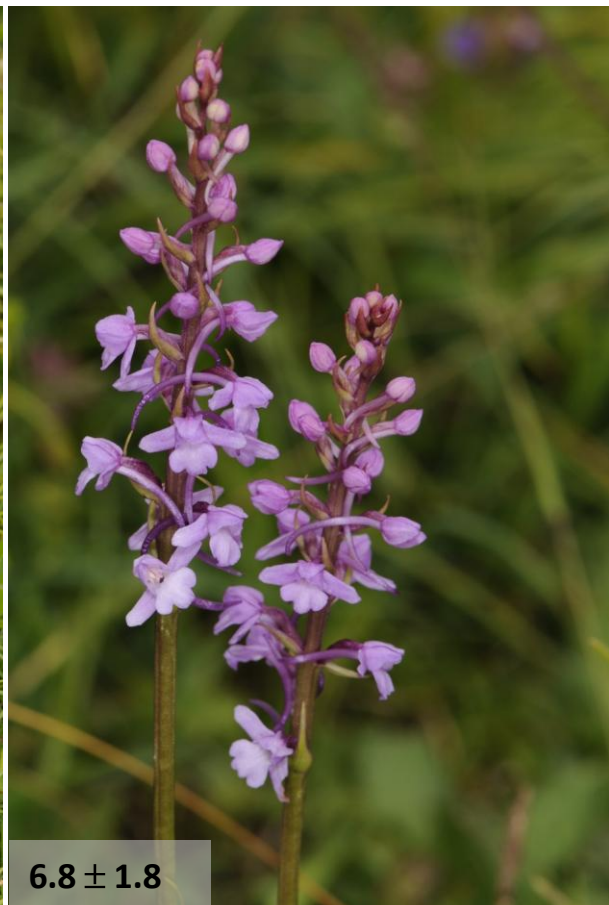

**French diploid – loc. FR05:** Chaumussay, Indre-et-Loire, Central France, 100 m a.s.l., 1.6.2007 (O. Marchand)

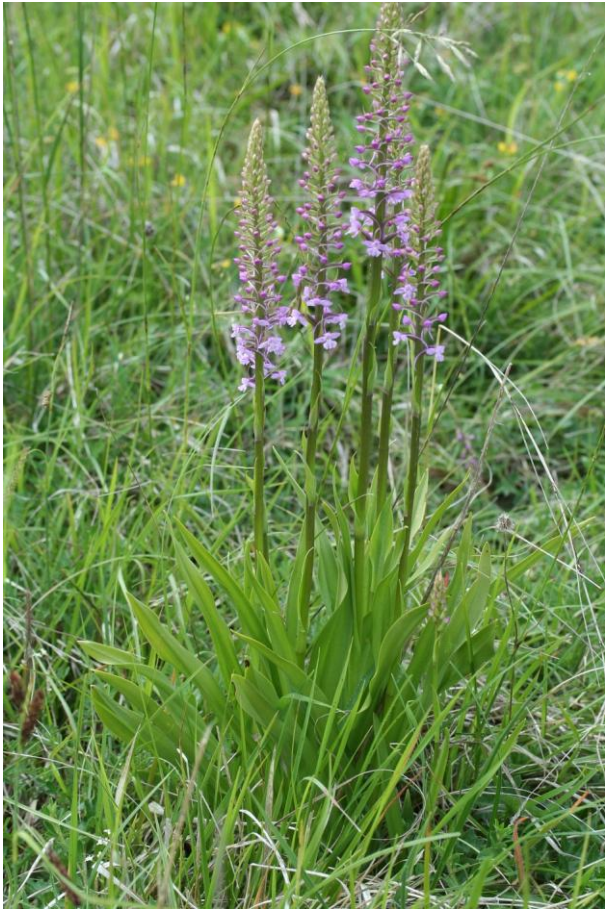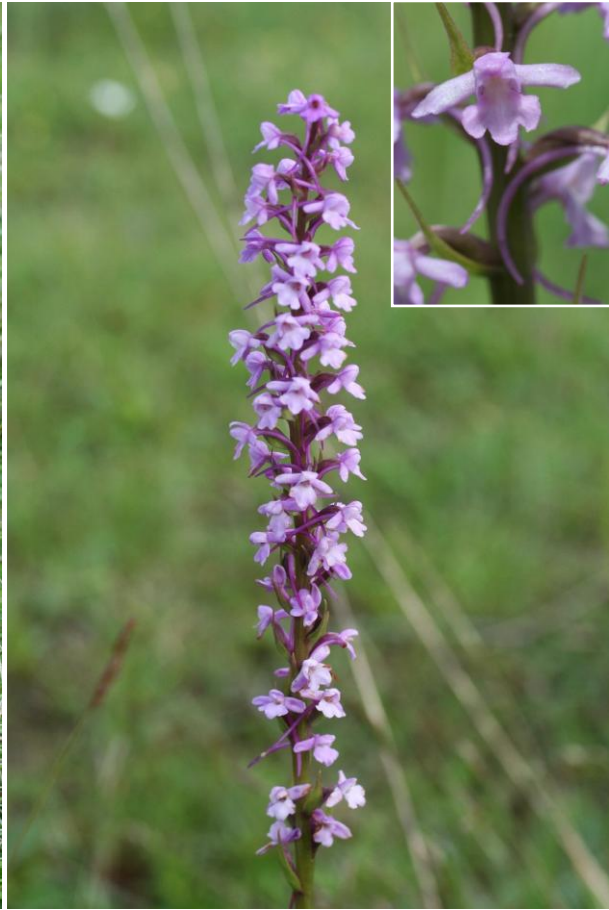

**French diploid – loc. FR10:** Bagnères-de-Bigorre, Midi-Pyrénées, France, 1260 m a.s.l., 4.7.2011 (P. Trávníček)

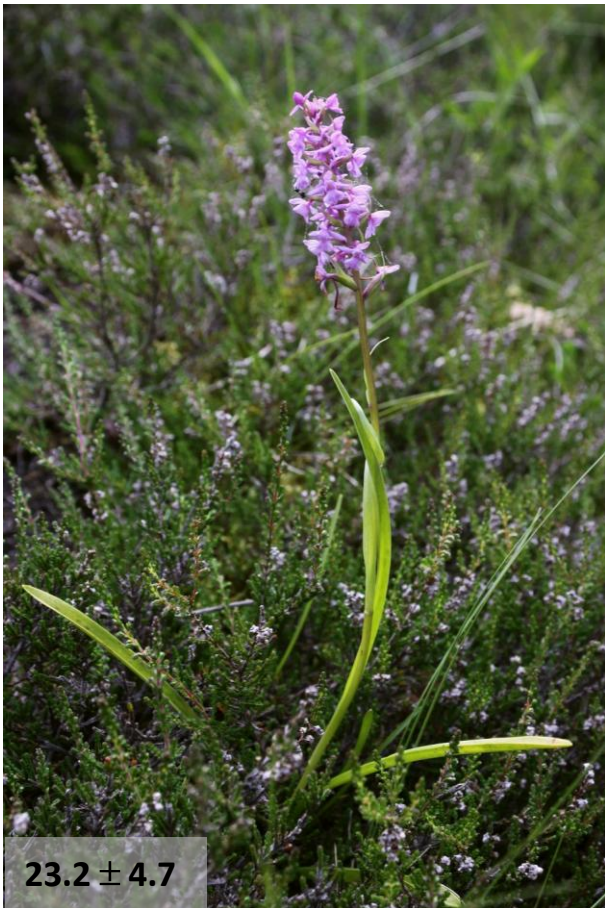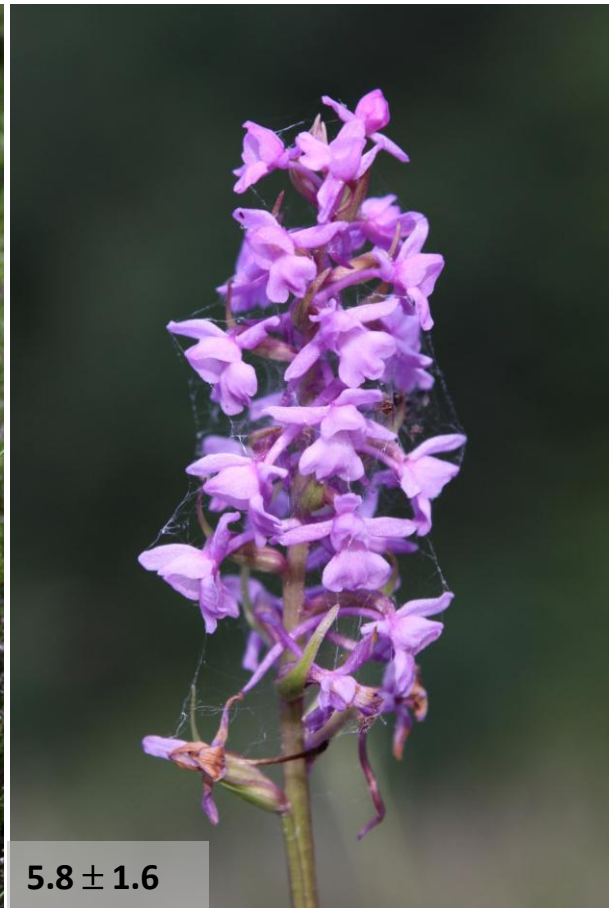

**French tetraploid – loc. FR05:** Chaumussay, Indre-et-Loire, Central France, 100 m a.s.l., 24.5.2008 (O. Marchand)

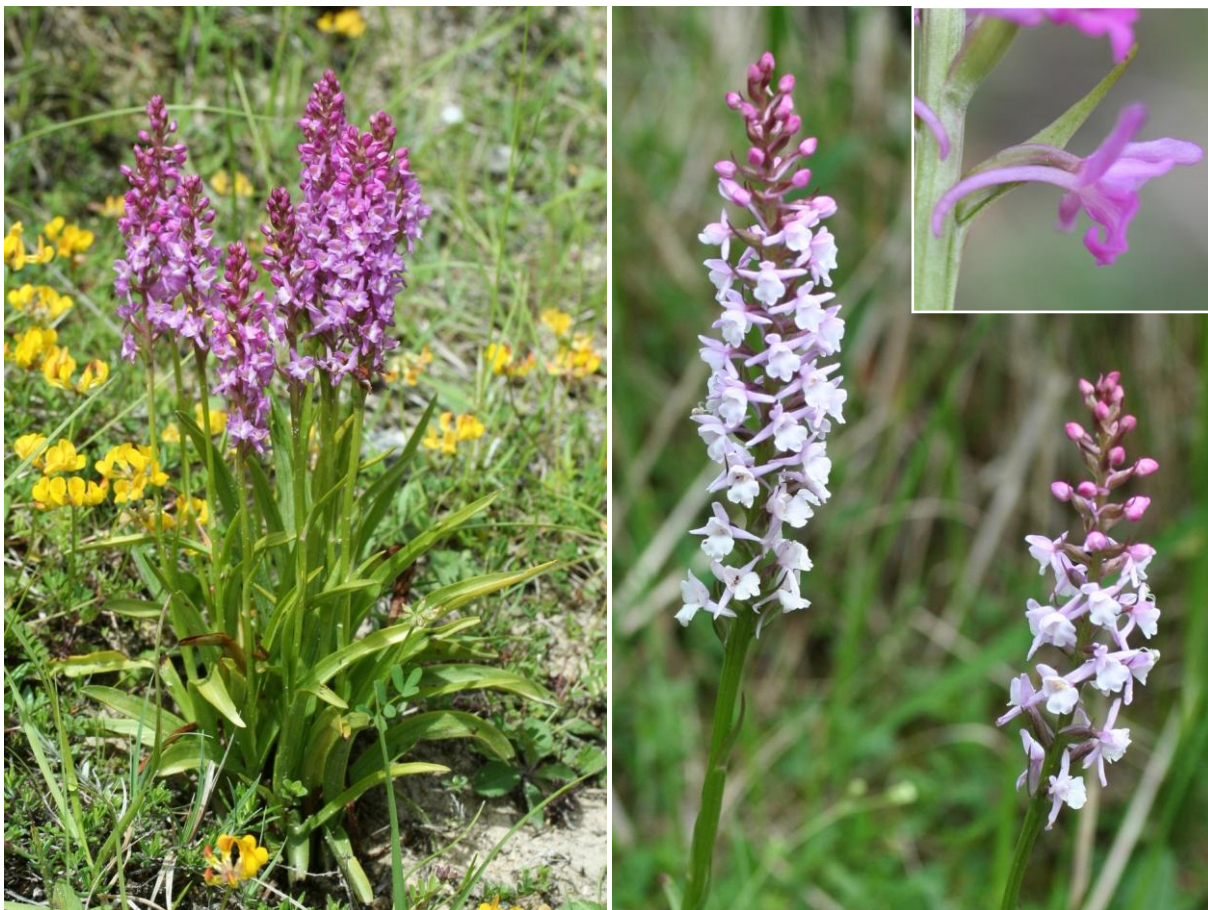

**French tetraploid – loc. FR04:** Marcilly-sur-Vienne, Indre-et-Loire, Central France, 70 m a.s.l., 14.6.2009 (J.-P. Amardeilh)

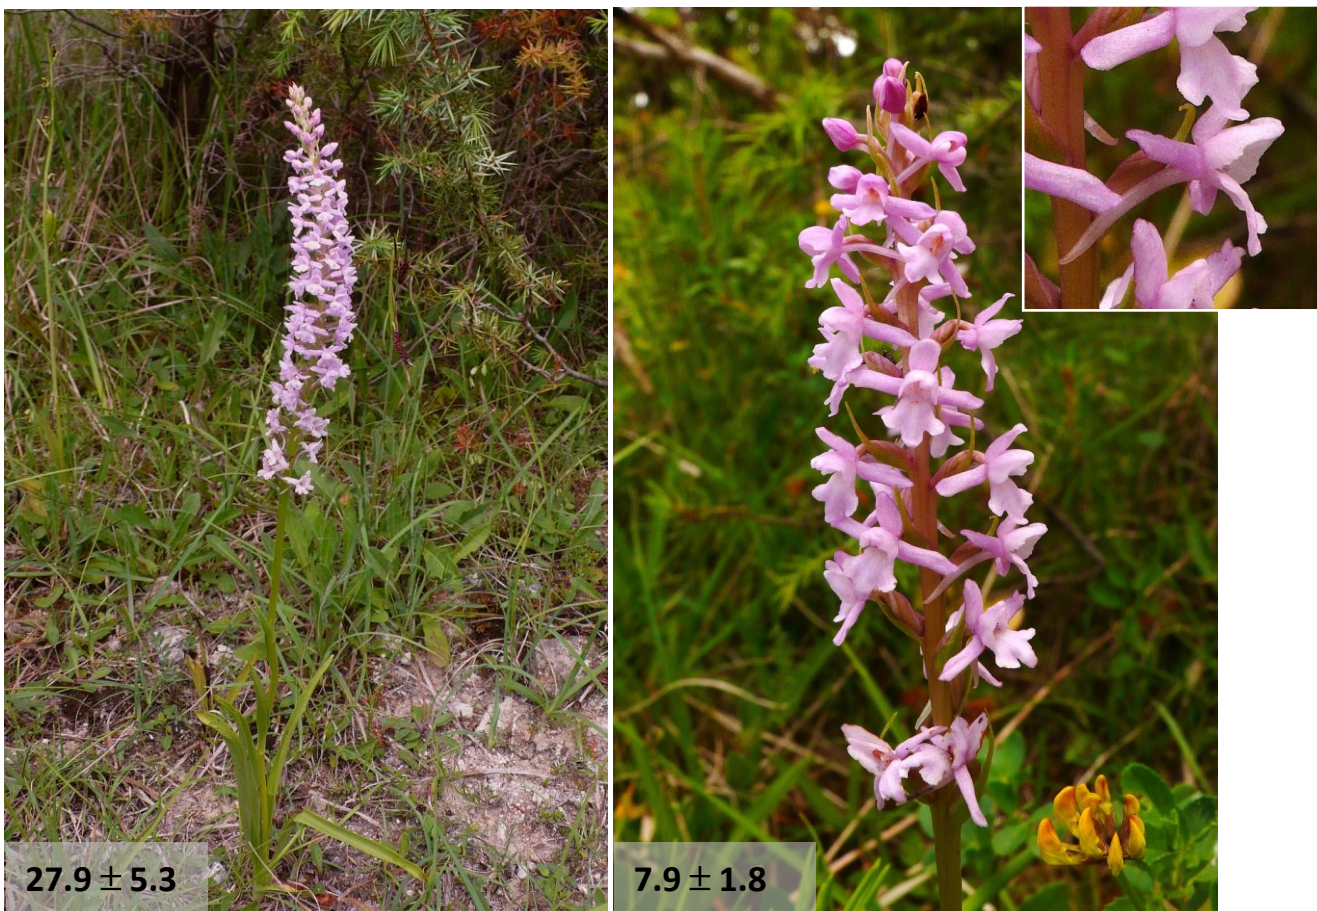

Plants corresponding to *G. conopsea* var. *friesica* (synonymized with *G. densiflora* in our study) – loc. NL01: Schiermonnikoog, Netherlands, 1 m a.s.l., 8.8.2010 (C.A.J. Kreutz)

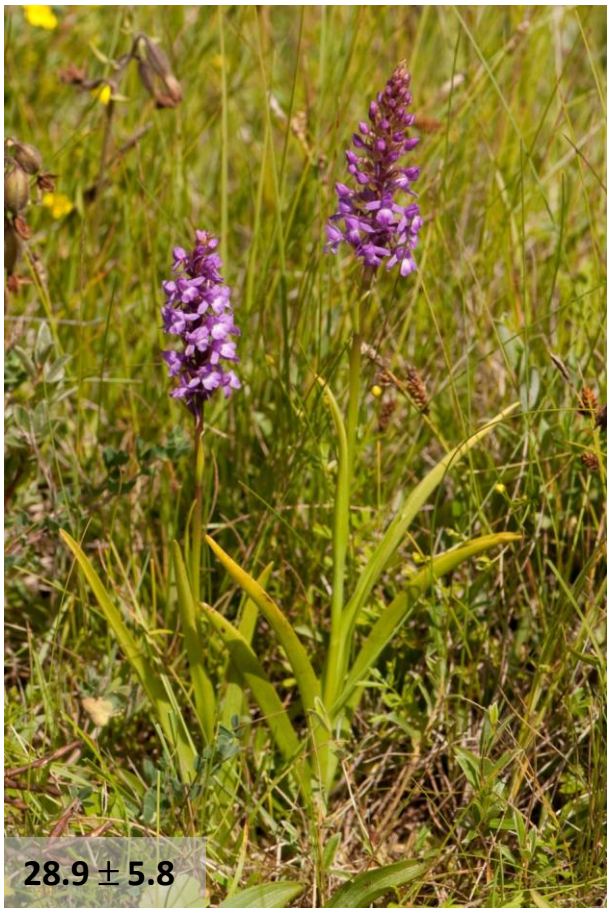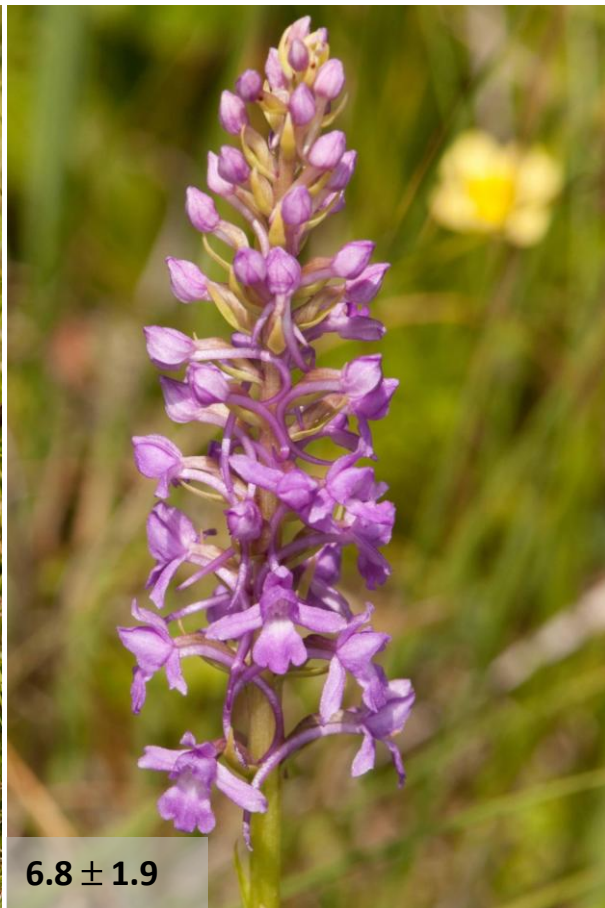

Plants corresponding to *G. vernalis* (synonymized with *G. conopsea* in our study) – loc. DE17: Huglfing, Upper Bavaria, Germany, 610 m a.s.l., 26.5.2011 (V. Čurn)

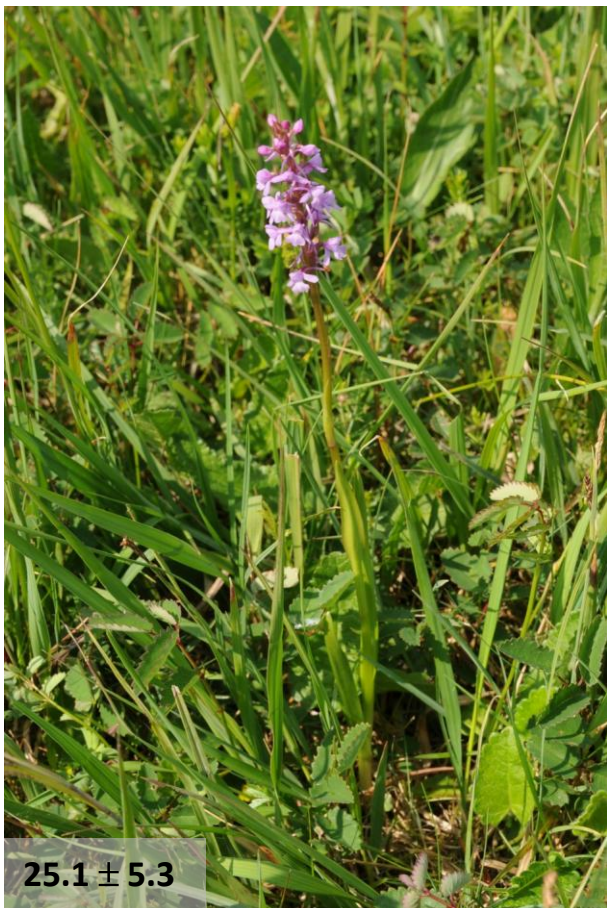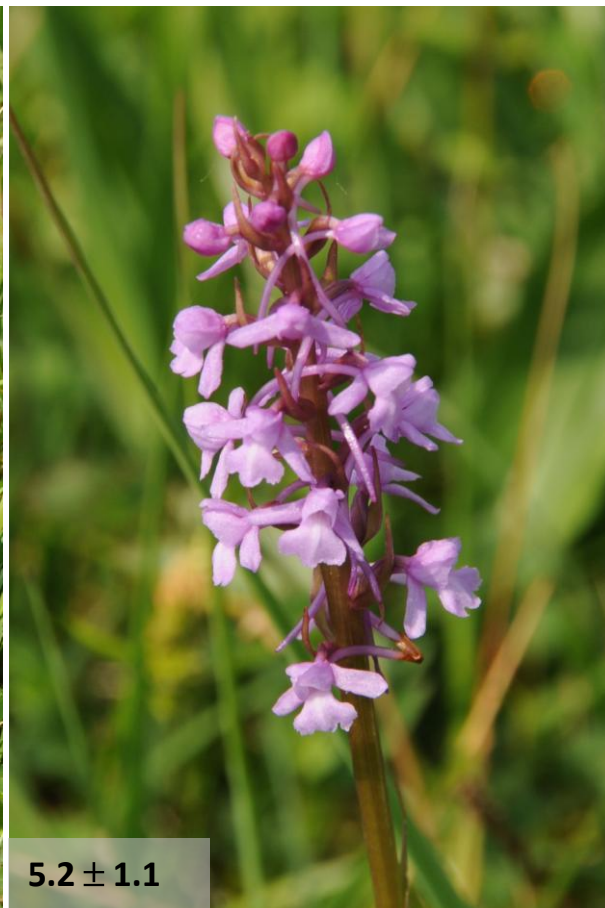

Plants corresponding to *G. conopsea* var. *serotina* (synonymized with *G. densiflora* in our study) – loc. BE01: NR Torfbroek, Berg, Belgium, 20 m a.s.l., 13.7.2010 (C.A.J. Kreutz)

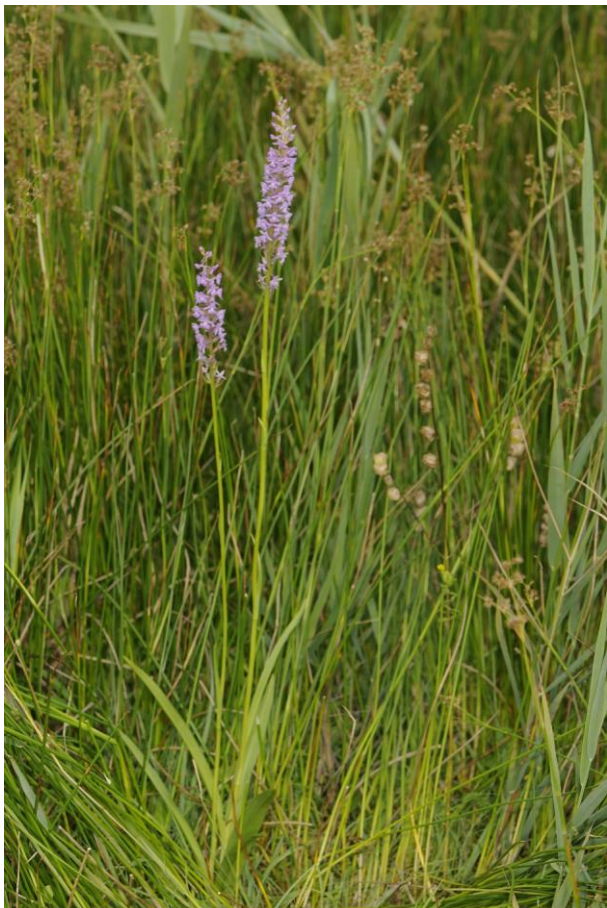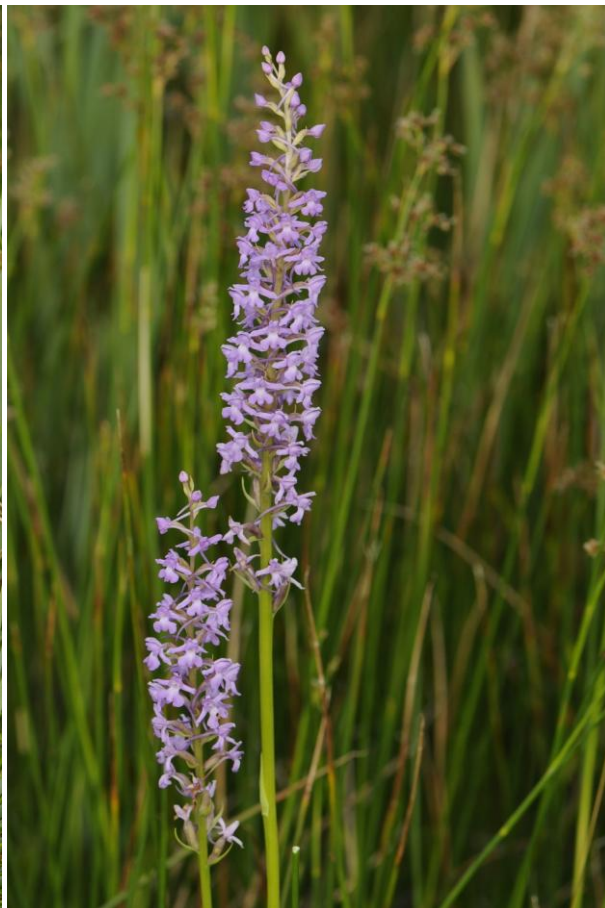

Plants corresponding to *G. conopsea* var. *serotina* (synonymized with *G. densiflora* in our study) – loc. DE19: Spitsingsee, Upper Bavaria, Germany, 1030 m a.s.l., 19.7.2010 (C.A.J. Kreutz)

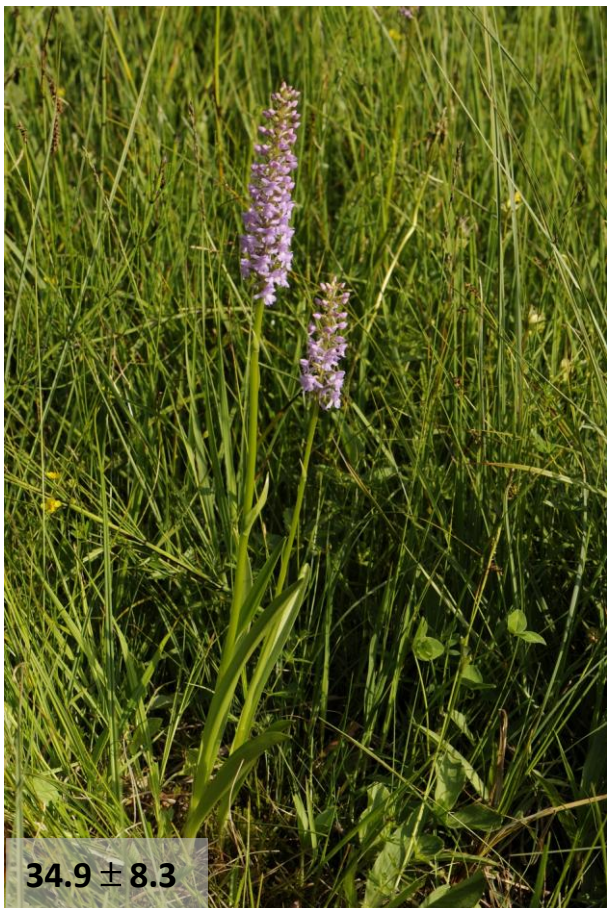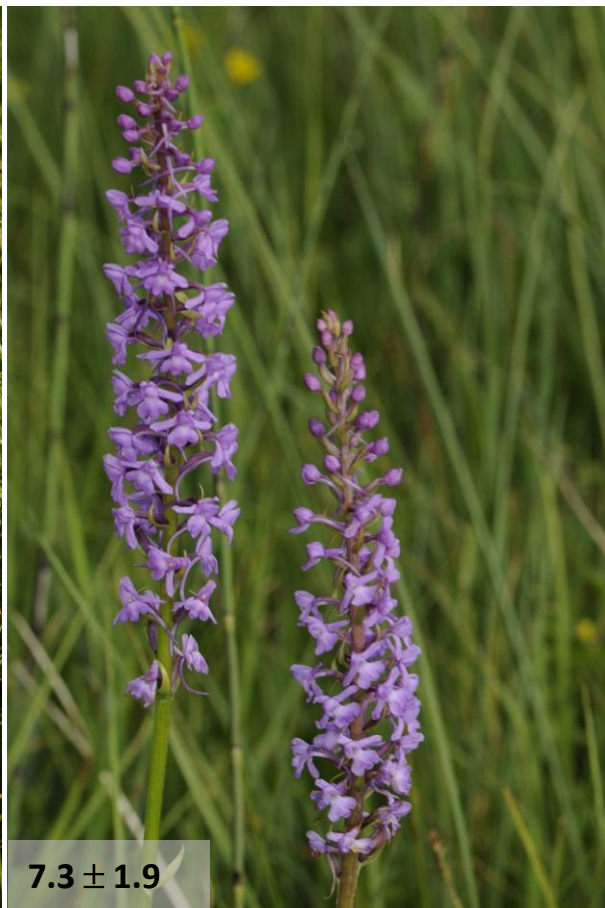

Plants corresponding to *G. odoratissima* subsp. *longicalcarata* (likely identical with the **French diploid**) – loc. ES01: Izkiz Natural Park, N Spain, 685 m a.s.l., 1.7.2007 (C. Hermosilla)

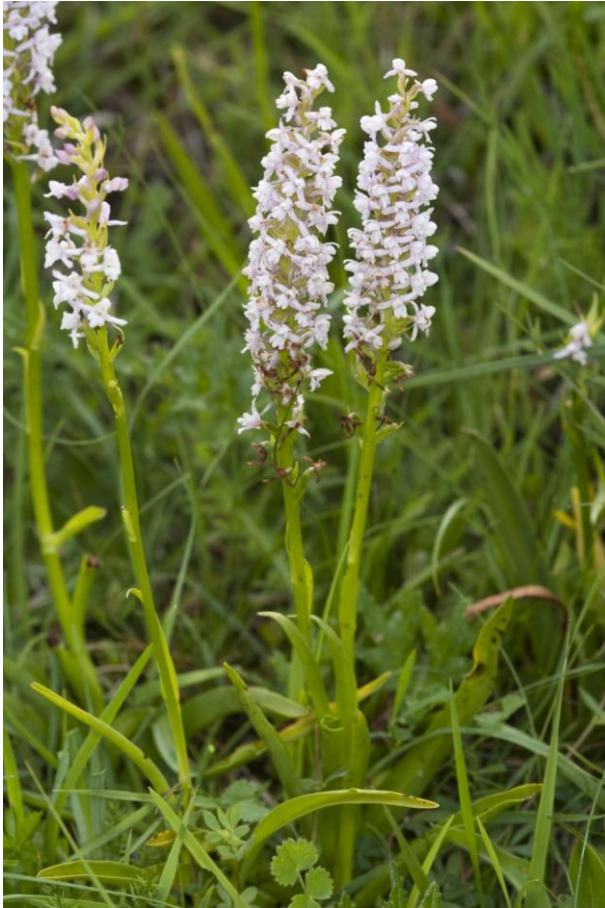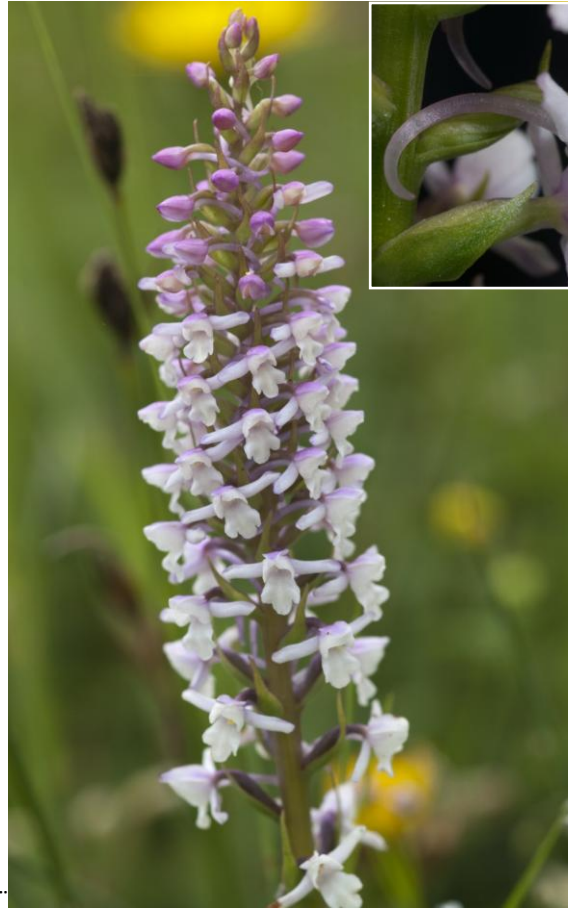

TABLE S1. Locality details (including geographic co-ordinates and altitude) and species/ploidy composition of 141 *Gymnadenia* populations from 17 European countries. Asterisks denote localities where herbarium vouchers (stored in PRC or CBFS) were collected. Taxa abbreviation: 2B, 2x *G. borealis*; 2C, 2x *G. conopsea*; 2D, 2x *G. densiflora*; 2F, 2x *G. frivaldii*; 2O, 2x *G. odoratissima*; 2Sp, undetermined diploid from France; 4C, 4x *G. conopsea*; 4Sp, undetermined tetraploid from France.

| Pop. | Locality Description                                                                                                                                                             | Geographical co-ordinates | Altitude (m a.s.l.) | No. of plants | 2B | 2C | 2D | 2F | 2O | 2Sp | 3x | 4C | 4Sp | 5x | 6x | Note                                                                                    |
|------|----------------------------------------------------------------------------------------------------------------------------------------------------------------------------------|---------------------------|---------------------|---------------|----|----|----|----|----|-----|----|----|-----|----|----|-----------------------------------------------------------------------------------------|
| AT01 | AT - Lower Austria, Mostviertel, Ybbstaler Alpen, Durrenstein - grassland on skeletal soil on slopes in the Seetal valley, between Klausee and Ludwigfall, 5 km S of Lunz am See | N47.8090<br>E15.0773      | 1080                | 10            |    |    |    |    |    |     |    | 10 |     |    |    |                                                                                         |
| AT02 | AT - Lower Austria, Mostviertel, Ybbstaler Alpen, Durrenstein - mesophytic grassland and roadsides between Seehof and Mittersee, 3 km S of Lunz am See                           | N47.8353<br>E15.0729      | 740                 | 17            |    |    |    |    |    |     |    | 17 |     |    |    |                                                                                         |
| AT03 | AT - Lower Austria, Mostviertel, Ybbstaler Alpen, Durrenstein - mesophytic grassland and skeletal slopes above Seebach, 4 km S of Lunz am See                                    | N47.8178<br>E15.0788      | 880                 | 33            |    | 2  |    |    | 3  |     |    | 27 |     | 1  |    |                                                                                         |
| AT04 | AT - Upper Austria, Traunkreis, Dachstein, Am Hohen Riedel - alpine grassland on skeletal soil on the plateau 750 W of the Adamek Hutte                                          | N47.4949<br>E13.5738      | 2020                | 55            |    | 53 |    |    |    |     | 1  | 1  |     |    |    | <i>G. conopsea</i> var. <i>alpina</i>                                                   |
| AT05 | AT - Upper Austria, Traunkreis, Dachstein, Grobgestein Hutte - grassland and spring area 1 km SE of Hintere See Alm                                                              | N47.4959<br>E13.5628      | 1640                | 63            |    | 60 |    |    | 2  |     | 1  |    |     |    |    | <i>G. conopsea</i> var. <i>alpina</i>                                                   |
| AT06 | AT - Upper Austria, Traunkreis, Dachstein, Kreidenbach - spring area and subalpine meadows 750 m SE of Hintere See Alm                                                           | N47.4959<br>E13.5574      | 1550                | 11            |    |    |    |    | 11 |     |    |    |     |    |    |                                                                                         |
| AT07 | AT - Upper Austria, Traunkreis, Dachstein - moist grassland on the NE side of Vorderer Gosausee 500 m E of the Gosausee hotel                                                    | N47.5311<br>E13.5064      | 940                 | 11            |    | 1  | 10 |    |    |     |    |    |     |    |    |                                                                                         |
| AT08 | AT - Upper Austria, Traunkreis, Totes Gebirge, Laaberg - grassy forest margin ca 5 km N of Hinterstoder                                                                          | N47.7504<br>E14.1639      | 550                 | 25            |    |    | 25 |    |    |     |    |    |     |    |    |                                                                                         |
| AT09 | AT - Upper Austria, Traunkreis, Totes Gebirge, Warscheneck - spring area and moist meadow ca 4.5 km SW of Spital am Pyhrn                                                        | N47.6294<br>E14.3140      | 930                 | 65            |    |    | 63 |    |    |     | 2  |    |     |    |    |                                                                                         |
| BE01 | BE - Flemish Brabant, Kampenhout, Berg - nature reserve Torfbroek, rich fen ca 15 km NE of Brussels                                                                              | N50.9274<br>E4.5381       | 20                  | 26            |    |    | 26 |    |    |     |    |    |     |    |    | putative occurrence of <i>G. conopsea</i> subsp. <i>serotina</i> sensu Dworschak (2002) |
| BG01 | BG - Blagoevgrad, Yakoruda, Rila mts. - spring along the road 350 m W of the south-western dam of the                                                                            | N42.1493<br>E23.7733      | 1920                | 11            |    |    |    | 10 |    |     | 1  |    |     |    |    |                                                                                         |

| Pop. | Locality Description                                                                                                                    | Geographical co-ordinates | Altitude (m a.s.l.) | No. of plants | 2B | 2C | 2D | 2F | 2O | 2Sp | 3x | 4C  | 4Sp | 5x | 6x | Note                                       |
|------|-----------------------------------------------------------------------------------------------------------------------------------------|---------------------------|---------------------|---------------|----|----|----|----|----|-----|----|-----|-----|----|----|--------------------------------------------|
|      | Belmeken Reservoir                                                                                                                      |                           |                     |               |    |    |    |    |    |     |    |     |     |    |    |                                            |
| BG02 | BG - Blagoevgrad, Yakoruda, Rila mts. - spring on the left bank of the stream 2.3 km of the south-western dam of the Belmeken Reservoir | N42.1614<br>E23.7571      | 2100                | 22            |    |    |    | 22 |    |     |    |     |     |    |    |                                            |
| BG03 | BG - Plovdiv, Asenovgrad, Rodopi mts. - open forest in the valley ca 4.5 km E of Dobrostan                                              | N41.9124<br>E24.8727      | 1130                | 3             |    | 3  |    |    |    |     |    |     |     |    |    |                                            |
| CH01 | CH - Aargau, Brugg, Effingen - southern slope of Jurassic mountain, calcareous, dry meadow, poor in nutrients                           | N47.4987<br>E8.1023       | 485                 | 71            |    | 15 | 29 |    | 26 |     | 1  |     |     |    |    |                                            |
| CH02 | CH - Aargau, Brugg, Villnachern - southern slope of Jurassic mountain, calcareous, dry meadow, poor in nutrients (former vineyard)      | N47.4751<br>E8.1618       | 460                 | 190           |    |    | 76 |    |    |     | 7  | 103 |     | 4  |    |                                            |
| CH03 | CH - Bern, Oberhasli, Oberwald - moist meadow 0.5 km E of Gletsch                                                                       | N46.5620<br>E8.3562       | 1845                | 29            |    | 28 |    |    |    |     | 1  |     |     |    |    |                                            |
| CH04 | CH - Graubünden, Albula District, Tiefencastel - dry alpine-subalpine meadow, calcareous soil                                           | N46.6286<br>E9.5214       | 2100                | 47            |    | 47 |    |    |    |     |    |     |     |    |    | <i>G. conopsea</i> var. <i>alpina</i>      |
| CH05 | CH - Ticino, Leventina, Airolo - dry alpine-subalpine meadow on the bank of lake Lago Ritom, calcareous soil                            | N46.5473<br>E8.6917       | 2115                | 14            |    | 14 |    |    |    |     |    |     |     |    |    | <i>G. conopsea</i> var. <i>alpina</i>      |
| CH06 | CH - Valais, Goms - Tessiner Alpen - moist meadows along stream 1 km W of the Nufenen Pass                                              | N46.4785<br>E8.3772       | 2215                | 1             |    | 1  |    |    |    |     |    |     |     |    |    | <i>G. conopsea</i> var. <i>alpina</i>      |
| CH07 | CH - Valais, Leuk - Bernese Alps - moist meadows and marshes along stream in Lirschigrabu, ca 5 km N of Leuk                            | N46.3456<br>E7.6366       | 1420                | 18            |    |    | 18 |    |    |     |    |     |     |    |    |                                            |
| CH08 | CH - Valais, Leuk, Varen - grassy roadsides in open forest 1 km NW of Inden                                                             | N46.3493<br>E7.6076       | 1365                | 42            |    | 36 | 6  |    |    |     |    |     |     |    |    |                                            |
| CH09 | CH - Valais, Sion, Bernese Alps, Sanetch - meadows and pastures above the timberline ca 10 km NW of Sion                                | N46.3329<br>E7.2866       | 2240                | 8             |    | 1  | 7  |    |    |     |    |     |     |    |    | <i>G. conopsea</i> var. <i>alpina</i> + 2D |
| CH10 | CH - Valais, Sion, Bernese Alps, Sanetch - moist meadows and pastures above the timberline ca 8 km NW of Sion                           | N46.3100<br>E7.3197       | 1960                | 15            |    |    | 15 |    |    |     |    |     |     |    |    |                                            |
| CH11 | CH - Valais, Sion, Bernese Alps, Sanetch - moist meadows and spring area above the timberline ca 9 km NW of Sion                        | N46.3094<br>E7.3262       | 1820                | 14            |    |    | 14 |    |    |     |    |     |     |    |    |                                            |
| CH12 | CH - Valais, Sion, Bernese Alps, Saviese - moist meadows and forest margins ca 7 km NW of Sion                                          | N46.2992<br>E7.3208       | 1420                | 14            |    |    | 14 |    |    |     |    |     |     |    |    |                                            |
| CH13 | CH - Zurich, Dielsdorf, Niederhasli - moist meadow close to the Zurich airport                                                          | N47.4668<br>E8.5374       | 420                 | 51            |    |    | 20 |    |    |     | 4  | 27  |     |    |    |                                            |
| CH14 | CH - Zurich, Meilen, Adliswil - meadow, poor in nutrients close to Felsenegg                                                            | N47.3112<br>E8.5117       | 630                 | 20            |    |    | 9  |    | 3  |     | 1  | 7   |     |    |    |                                            |



| Pop. | Locality Description                                                                                                                                                                                          | Geographical co-ordinates | Altitude (m a.s.l.) | No. of plants | 2B | 2C | 2D | 2F | 2O | 2Sp | 3x | 4C | 4Sp | 5x | 6x | Note                                                                                           |
|------|---------------------------------------------------------------------------------------------------------------------------------------------------------------------------------------------------------------|---------------------------|---------------------|---------------|----|----|----|----|----|-----|----|----|-----|----|----|------------------------------------------------------------------------------------------------|
| CH15 | CH -Graubünden, Albula District, Bergün - dry alpine meadow, calcareous soil                                                                                                                                  | N46.5817<br>E9.8137       | 2220                | 38            |    | 19 |    |    | 19 |     |    |    |     |    |    | <i>G. conopsea</i> var. <i>alpina</i> + 2O                                                     |
| DE01 | DE - Lower Saxony, Holzminden, Bevern - semidry grassland 1.1 km NW of Lobach                                                                                                                                 | N51.8724<br>E9.5121       |                     | 50            |    |    |    |    |    |     |    | 47 |     | 3  |    |                                                                                                |
| DE02 | DE - Lower Saxony, Holzminden, Hehlen - dry grassland 1.3 km WNW of Pegestorf                                                                                                                                 | N51.9320<br>E9.4796       | 125                 | 50            |    |    |    |    |    |     | 1  | 49 |     |    |    |                                                                                                |
| DE03 | DE - Saxony-Anhalt, Burgenlandkreis, Hohenmölsen - wet fen 2.2 km S of Hohenmölsen                                                                                                                            | N51.1359<br>E12.1088      | 185                 | 43            |    |    | 42 |    |    |     | 1  |    |     |    |    |                                                                                                |
| DE04 | DE - Saxony-Anhalt, Saalekreis, Querfurt - dry grassland 1 km NE of Grockstädt                                                                                                                                | N51.3345<br>E11.5898      | 200                 | 36            |    |    |    |    |    |     |    | 31 |     | 4  | 1  |                                                                                                |
| DE05 | DE - Saxony-Anhalt, Burgenlandkreis, Balgstädt - dry grassland 1.2 km E of Grössnitz                                                                                                                          | N51.1851<br>E11.7317      | 195                 | 48            |    |    | 33 |    |    |     |    | 15 |     |    |    |                                                                                                |
| DE06 | DE - Saxony-Anhalt, Burgenlandkreis, Balgstädt - dry grassland 1.7 km S of Balgstädt                                                                                                                          | N51.1900<br>E11.7352      | 205                 | 46            |    |    | 1  |    |    |     |    | 45 |     |    |    |                                                                                                |
| DE07 | DE - Upper Bavaria, Garmisch-Partenkirchen, Northern Limestone Alps, Wetterstein, Gertraudtafel - xerophytic and mesophytic grassland on skeletal slopes 250 m NW of the lower cableway station in Mittenwald | N47.4470<br>E11.2510      | 1105                | 41            |    | 38 | 2  |    |    |     | 1  |    |     |    |    | putative occurrence of <i>G. graminea</i> and <i>G. splendida</i> sensu Dworschak (2002)       |
| DE08 | DE - Upper Bavaria, Garmisch-Partenkirchen, Northern Limestone Alps, Wetterstein, Kalvarienberg - spring area and meadow 100 m NW of the lower cableway station in Mittenwald                                 | N47.4446<br>E11.2549      | 1080                | 48            |    | 48 |    |    |    |     |    |    |     |    |    |                                                                                                |
| DE09 | DE - Upper Bavaria, Garmisch-Partenkirchen, Northern Limestone Alps, Wetterstein, Korbinianhütte - grassy forest margin and meadow 500 m NW of the lower cableway station in Mittenwald                       | N47.4488<br>E11.2439      | 1180                | 72            |    | 72 |    |    |    |     |    |    |     |    |    |                                                                                                |
| DE10 | DE - Upper Bavaria, Garmisch-Partenkirchen, Northern Limestone Alps, Wetterstein, St. Anton - spring area and meadow 750 m NW of the lower cableway station in Mittenwald                                     | N47.4496<br>E11.2404      | 1230                | 60            |    | 60 |    |    |    |     |    |    |     |    |    | <i>G. conopsea</i> var. <i>alpina</i>                                                          |
| DE11 | DE - Upper Bavaria, Landsberg, Bavarian Alpine Foreland, Donau, Lechtal - meadows around the water reservoirs along the river Lech, 2 km W of Prittriching                                                    | N48.2075<br>E10.9049      | 550                 | 56            |    | 43 |    |    |    |     | 2  | 10 |     | 1  |    | putative occurrence of <i>G. splendida</i> sensu Dworschak (2002)                              |
| DE12 | DE - Upper Bavaria, Landsberg, Bavarian Alpine Foreland, Donau, Lechtal - meadows around the water reservoirs along the river Lech, 3 km W of Prittriching                                                    | N48.2018<br>E10.8991      | 550                 | 45            |    | 1  |    |    |    |     | 10 | 34 |     |    |    | putative occurrence of <i>G. conopsea</i> subsp. <i>serotina</i> sensu Dworschak (2002)        |
| DE13 | DE - Upper Bavaria, Landsberg, Bavarian Alpine Foreland, Donau, Lechtal - moist meadows and forest margins along the river Lech, 4 km SW of Prittriching                                                      | N48.1935<br>E10.8898      | 560                 | 76            |    | 63 |    |    |    |     | 6  | 7  |     |    |    |                                                                                                |
| DE14 | DE - Upper Bavaria, Weilheim-Schongau, Bavarian Alpine Foreland - spring area, moist and peaty meadow between Polling and Etting, along the Ettinger Bach                                                     | N47.8049<br>E11.1548      | 590                 | 59            |    | 5  | 14 |    |    |     | 3  | 37 |     |    |    | putative occurrence of <i>G. splendida</i> and <i>G. conopsea</i> subsp. <i>serotina</i> sensu |

| Pop. | Locality Description                                                                                                                                                            | Geographical co-ordinates | Altitude (m a.s.l.) | No. of plants | 2B | 2C | 2D | 2F | 2O | 2Sp | 3x | 4C | 4Sp | 5x | 6x | Note                                                                                    |
|------|---------------------------------------------------------------------------------------------------------------------------------------------------------------------------------|---------------------------|---------------------|---------------|----|----|----|----|----|-----|----|----|-----|----|----|-----------------------------------------------------------------------------------------|
|      |                                                                                                                                                                                 |                           |                     |               |    |    |    |    |    |     |    |    |     |    |    | Dworschak (2002)                                                                        |
| DE15 | DE - Upper Bavaria, Weilheim-Schongau, Bavarian Alpine Foreland - moist and mesophytic meadow 200 m S-SE of the railway station Huglfing                                        | N47.7748<br>E11.1420      | 595                 | 4             |    | 4  |    |    |    |     |    |    |     |    |    |                                                                                         |
| DE16 | DE - Upper Bavaria, Weilheim-Schongau, Bavarian Alpine Foreland - moist meadows and forest margins 750 m S of Rechetsberg, ca 6 km SW of Huglfing                               | N47.7463<br>E11.0908      | 690                 | 20            |    | 20 |    |    |    |     |    |    |     |    |    | putative occurrence of <i>G. vernalis</i> sensu Dworschak (2002)                        |
| DE17 | DE - Upper Bavaria, Weilheim-Schongau, Bavarian Alpine Foreland - moist meadows, pastures and spring areas between Deimenried and Grasleitenweg, 3 km SW of Huglfing            | N47.7574<br>E11.1284      | 610                 | 17            |    | 17 |    |    |    |     |    |    |     |    |    | putative occurrence of <i>G. vernalis</i> sensu Dworschak (2002)                        |
| DE18 | DE - Upper Bayern, Bad Tölz-Wolfratshausen, Bavarian Alpine Foreland - xerophytic and mesophytic grassland opening in pine forest along the river Isar 1 km E of Wolfratshausen | N47.9234<br>E11.4461      | 635                 | 57            |    | 14 | 5  |    |    |     |    | 35 |     |    | 3  | putative occurrence of <i>G. splendida</i> sensu Dworschak (2002)                       |
| DE19 | DE - Upper Bayern, Miesbach, Northern Limestone Alps, Mangfall Alps - moist meadows and marshes 300 m SE of Albert-Link-Hutte, 1 km S of Spitsingsee                            | N47.6532<br>E11.8913      | 1030                | 43            |    |    | 42 |    |    |     | 1  |    |     |    |    | putative occurrence of <i>G. conopsea</i> subsp. <i>serotina</i> sensu Dworschak (2002) |
| DE20 | DE - Upper Bayern, Rosenheim, Northern Limestone Alps, Mangfall Alps - moist meadows and spring areas above Deutsche Alpenstrasse, 2 km E of Sudelfeld                          | N47.6853<br>E12.0545      | 1040                | 6             |    |    | 6  |    |    |     |    |    |     |    |    |                                                                                         |
| EE01 | EE - Lääne County, Hanila Parish, Hanila - Sillukse old airfield, flat alvar site                                                                                               | N58.6212<br>E23.5491      | 15                  | 30            |    | 30 |    |    |    |     |    |    |     |    |    |                                                                                         |
| EE02 | EE - Saare County, Lümända Parish, Lümända - Viidumäe nature reserve, spring fen                                                                                                | N58.2989<br>E22.0756      | 15                  | 24            |    | 20 | 2  |    | 2  |     |    |    |     |    |    |                                                                                         |
| EE03 | EE - Saare County, Muhu, Kallaste - Üügu - limestone cliff on the northern coast                                                                                                | N58.6719<br>E23.2373      | 5                   | 37            |    | 26 | 11 |    |    |     |    |    |     |    |    |                                                                                         |
| ES01 | ES- Basque Country, Álava, Arraia-Maetztu, Izkiz Natural Park - grassy and juniper slopes, loamy soil                                                                           | N42.6923<br>W2.4368       | 685                 | 13            |    |    |    |    |    |     | 13 |    |     |    |    |                                                                                         |
| FR01 | FR - Aquitaine, Gironde, Les Salles de Castillon - dry grassland on calcareous soil                                                                                             | N44.9114<br>E0.0153       | 50                  | 84            |    |    | 17 |    |    | 2   | 10 |    | 55  |    |    |                                                                                         |
| FR02 | FR - Centre, Indre, Châteauroux, Cléré-du-Bois - calcareous grassland 2.9 km SW of the village                                                                                  | N46.9160<br>E1.0769       | 120                 | 21            |    |    |    |    |    |     | 21 |    |     |    |    |                                                                                         |
| FR03 | FR - Centre, Indre, Châteauroux, Saulnay - alkaline marshes 1.5 km SW of the village                                                                                            | N46.8503<br>E1.2757       | 100                 | 50            |    |    |    |    | 24 | 26  |    |    |     |    |    |                                                                                         |
| FR04 | FR - Centre, Indre-et-Loire, Marcilly-sur-Vienne - grassland with junipers on chalk slopes                                                                                      | N47.0581<br>E0.5197       | 70                  | 58            |    |    |    |    |    | 5   | 1  |    | 49  | 2  | 1  |                                                                                         |
| FR05 | FR - Centre, Indre-et-Loire, Preuilly-sur-Claise - grassland near the place called "La forge" 1.8 km SE of Chaumussy                                                            | N46.8650<br>E0.8770       | 100                 | 30            |    |    |    |    |    | 18  |    |    | 12  |    |    |                                                                                         |







| Pop. | Locality Description                                                                                                         | Geographical co-ordinates | Altitude (m a.s.l.) | No. of plants | 2B | 2C | 2D | 2F | 2O | 2Sp | 3x | 4C | 4Sp | 5x | 6x | Note |
|------|------------------------------------------------------------------------------------------------------------------------------|---------------------------|---------------------|---------------|----|----|----|----|----|-----|----|----|-----|----|----|------|
|      | Mountains - meadow E of the village Salciua                                                                                  | E23.4523                  |                     |               |    |    |    |    |    |     |    |    |     |    |    |      |
| RO04 | RO – Northwest, Alba county, Alba Iulia, Trascau Mountains - meadow near the Valeas Poienii chalet                           | N46.3513<br>E23.4724      | 830                 | 11            |    | 9  |    |    |    |     | 2  |    |     |    |    |      |
| RO05 | RO – Northwest, Alba county, Turda - east slope of the Scarita peak, calcareous soil                                         | N46.4967<br>E23.3839      | 1200                | 8             |    | 8  |    |    |    |     |    |    |     |    |    |      |
| RO06 | RO – Northwest, Alba county, Turda - meadow above the Cheile Pociovalistei glen                                              | N46.5003<br>E23.4137      | 750                 | 5             |    | 3  |    |    |    |     |    | 2  |     |    |    |      |
| RO07 | RO – Northwest, Alba county, Turda, Muntele Mare Massif - meadow near the La Crucea Margineanului chalet                     | N46.4736<br>E23.2808      | 1180                | 37            |    | 36 |    |    |    |     | 1  |    |     |    |    |      |
| RO08 | RO – Northwest, Alba county, Turda, Muntele Mare Massif - meadow W of the Creasta Stancoasa peak                             | N46.5052<br>E23.2635      | 1600                | 2             |    | 2  |    |    |    |     |    |    |     |    |    |      |
| RO09 | RO – Northwest, Cluj county, Gilau Massif, Scarita - Belioara nature reserve, meadow                                         | N46.4969<br>E23.3750      | 1320                | 75            |    | 57 |    |    |    |     | 3  | 13 |     |    | 2  |      |
| RU01 | RU - Leningrad Region, Lomonosov District, Glyadino - wet bottom of the old lime quarry 2 km N of the village                | N59.7298<br>E29.7752      | 100                 | 21            |    |    |    | 21 |    |     |    |    |     |    |    |      |
| RU02 | RU - Leningrad Region, Luga District, Pozharishche - spring sphagnum bog around the Bezymyannoye lake, 1 km S of the village | N58.8075<br>E30.4944      | 65                  | 3             |    | 3  |    |    |    |     |    |    |     |    |    |      |
| RU03 | RU - Leningrad Region, Slantzy District, Kamenka - mesophytic meadow along the road ca 4 km NW of the village                | N59.1407<br>E28.0326      | 50                  | 47            |    | 47 |    |    |    |     |    |    |     |    |    |      |
| RU04 | RU - Leningrad Region, Volosovo District, Arbonye - mesophytic meadow on limestone 2 km NE of the village                    | N59.4799<br>E29.7143      | 125                 | 44            |    | 42 |    |    |    |     | 2  |    |     |    |    |      |
| RU05 | RU - Leningrad Region, Volosovo District, Dontso reserve - mesophytic meadow on limestone 1 km E of Selo village             | N59.4324<br>E29.7618      | 100                 | 2             |    | 2  |    |    |    |     |    |    |     |    |    |      |
| RU06 | RU - Pskov Region, Pechory District, Malye Mil'tsy - mesophytic meadow 1 km S of the village                                 | N57.7126<br>E27.9050      | 70                  | 3             |    | 3  |    |    |    |     |    |    |     |    |    |      |
| RU07 | RU - Pskov Region, Pechory District, Staryi Izborsk village - spring bog on the slope of the Maly-Izborsk valley             | N57.7307<br>E27.8463      | 45                  | 10            |    |    |    | 9  |    |     | 1  |    |     |    |    |      |
| SE01 | SE - Gotland, Fårösund - alvar 1 km SE of the Bästeträsk lake                                                                | N57.8822<br>E18.9460      | 15                  | 163           |    | 35 | 61 |    | 65 |     | 2  |    |     |    |    |      |
| SE02 | SE - Gotland, Husken - grassy roadside on the road ca 3 km from Husken to Vallevik                                           | N57.7828<br>E18.9684      | 10                  | 39            |    |    | 39 |    |    |     |    |    |     |    |    |      |
| SE03 | SE - Gotland, Klintehamn - mire ca 8 km SE of Klintehamn, on the road to Lojsta                                              | N57.3437<br>E18.3218      | 70                  | 148           |    | 95 | 39 |    | 13 |     | 1  |    |     |    |    |      |

| Pop. | Locality Description                                                                                                                                                          | Geographical co-ordinates | Altitude (m a.s.l.) | No. of plants | 2B  | 2C   | 2D   | 2F | 2O  | 2Sp | 3x | 4C  | 4Sp | 5x | 6x | Note |
|------|-------------------------------------------------------------------------------------------------------------------------------------------------------------------------------|---------------------------|---------------------|---------------|-----|------|------|----|-----|-----|----|-----|-----|----|----|------|
| SE04 | SE - Gotland, Lärbro - northern part of Hoburgsmyr mire, close to the limestone quarry                                                                                        | N57.8280<br>E18.8413      | 30                  | 117           |     | 14   | 51   |    | 51  |     | 1  |     |     |    |    |      |
| SE05 | SE - Gotland, Vägume - grassy roadside 2.5 km on the road from Vägume to Hellvi                                                                                               | N57.7601<br>E18.8611      | 25                  | 47            |     |      | 46   |    |     |     | 1  |     |     |    |    |      |
| SE06 | SE - Gotland, Väskinda, Nature reserve Brucebo - wetland on the coast 1 km N of the Visby airport                                                                             | N57.6865<br>E18.3459      | 5                   | 55            |     |      | 55   |    |     |     |    |     |     |    |    |      |
| SE07 | SE - Gotland, Visby - mire ca 5 km SE of Visby, road 143 to Romakloster                                                                                                       | N57.5894<br>E18.3534      | 70                  | 137           |     | 50   | 48   |    | 38  |     | 1  |     |     |    |    |      |
| SE08 | SE - Jönköping, Värnamo - rich fen Björnekullakärret in NP Stora mosse, ca 7 km NW of Värnamo                                                                                 | N57.2197<br>E13.9274      | 165                 | 35            |     | 34   |      |    |     |     | 1  |     |     |    |    |      |
| SE09 | SE - Öland, Borgholm, Kvarnstad - alvar 1 km SE of Kvarnstad                                                                                                                  | N57.1273<br>E16.9949      | 5                   | 46            |     | 46   |      |    |     |     |    |     |     |    |    |      |
| SE10 | SE - Öland, Borgholm, Rälla - wetland and alvar 1.1 km W of Dyestad                                                                                                           | N56.7182<br>E16.6485      | 25                  | 63            |     | 12   | 49   |    |     |     | 2  |     |     |    |    |      |
| SE11 | SE - Öland, Borgholm, Rälla- wetland Amundmosse 1.2 km of Ismantorp                                                                                                           | N56.7550<br>E16.6840      | 25                  | 137           |     | 20   | 117  |    |     |     |    |     |     |    |    |      |
| SE12 | SE - Öland, Mörbylånga, Mörbylånga - sedge wetland Torpmossen 1.2 km W of Lilla Brunneby                                                                                      | N56.5141<br>E16.5643      | 20                  | 50            |     |      | 50   |    |     |     |    |     |     |    |    |      |
| SE13 | SE - Öland, Mörbylånga, Skogsby - sedge wetland 1.1 km NE of Gräborg fortification                                                                                            | N56.6755<br>E16.6087      | 35                  | 88            |     | 11   | 76   |    |     |     | 1  |     |     |    |    |      |
| SE14 | SE - Öland, Mörbylånga, Skogsby - wetland Igelmossen 1.6 km S of Gräborg fortification                                                                                        | N56.6523<br>E16.5991      | 35                  | 32            |     |      | 32   |    |     |     |    |     |     |    |    |      |
| SE15 | SE - Västergötland, Falköping - rich fen, nature reserve Skogartorpskärrer 1.2 km NE of Hogstena                                                                              | N58.2387<br>E13.7345      | 195                 | 191           |     | 70   | 71   |    | 50  |     |    |     |     |    |    |      |
| SK01 | SK - Prešov region, Kežmarok district, Belianske Tatry Mts., Bujačí - subalpine meadows on the Bujačí hill                                                                    | N49.2248<br>E20.2596      | 1570                | 43            |     | 42   |      |    |     |     | 1  |     |     |    |    |      |
| SK02 | SK - Prešov region, Kežmarok district, Belianske Tatry Mts., Kopské Sedlo - subalpine meadows along the tourist path between the Kopské sedlo saddle and the lake Biele Pleso | N49.2243<br>E20.2187      | 1710                | 85            |     | 84   |      |    |     |     | 1  |     |     |    |    |      |
| SK03 | SK - Prešov region, Kežmarok district, Belianske Tatry Mts., Plesnivec - subalpine meadows N of the Plesnivec chalet                                                          | N49.2236<br>E20.2729      | 1405                | 113           |     | 111  |      |    |     |     | 2  |     |     |    |    |      |
| SK04 | SK - Prešov region, Kežmarok district, Belianske Tatry Mts., Tatranská Javorina - meadows along the tourist path S of the Tatranská Javorina village                          | N49.2421<br>E20.1551      | 1195                | 2             |     | 2    |      |    |     |     |    |     |     |    |    |      |
| SK05 | SK - Prešov region, Kežmarok district, Belianske Tatry Mts., Tatranská Kotlina - open sites in forest along the tourist path SE of the Plesnivec chalet                       | N49.2198<br>E20.2852      | 1125                | 23            |     | 10   |      |    | 13  |     |    |     |     |    |    |      |
|      |                                                                                                                                                                               |                           |                     | 6150          | 599 | 2114 | 1538 | 32 | 464 | 565 | 94 | 528 | 192 | 17 | 7  |      |
